# Supplementary material for: Unveiling the molecular mechanism of SARS-CoV-2 main protease inhibition from 137 crystal structures using algebraic topology and deep learning
Source: Royal Society of Chemistry journal article supplement (doi:10.1039/d0sc04641h), 2020-01-01
Supplement: d0sc04641h3.xlsx [file d0sc04641h3.xlsx]

## Sheet: Table S1
PDBbind v2019
PDBID	pKd/pKi/pIC50
3zzf	0.4
3gww	0.45
1w8l	0.49
3fqa	0.49
1zsb	0.6
4obv	0.75
1wkm	0.82
3k41	0.82
4eu3	0.82
2w97	0.96
1p0y	1
2b1r	1
2d2v	1
1aw1	1.05
1maw	1.1
3fl9	1.11
5eb2	1.11
4lh2	1.24
4to8	1.24
4fci	1.26
4fck	1.26
4clp	1.27
1f9g	1.28
1a0t	1.3
1b74	1.3
2fah	1.3
2igw	1.31
5mnc	1.31
5mny	1.31
5moo	1.31
2vl1	1.35
3nm6	1.35
1qpb	1.36
1hty	1.4
1o4l	1.4
1o4m	1.4
1o4n	1.4
2hdq	1.4
3eor	1.4
3e81	1.43
1ozv	1.44
1utp	1.44
5eb3	1.45
1tnk	1.49
4bh4	1.49
4lh3	1.52
5ct1	1.52
5ele	1.52
3mwe	1.54
4amw	1.55
1iig	1.57
3rup	1.57
5cs5	1.58
5ofv	1.58
2b1q	1.59
1w8m	1.6
3itc	1.6
2it4	1.62
1a7t	1.64
4d63	1.64
1hgj	1.66
1rdj	1.66
2o9r	1.68
4qsw	1.68
2sfp	1.7
3gf2	1.7
3oay	1.7
4tyb	1.7
3g6m	1.71
2hdr	1.72
3ern	1.72
3vzg	1.72
3zst	1.72
5y61	1.72
1u2y	1.74
4qsx	1.74
5y62	1.74
5ggj	1.75
4bgx	1.77
3f39	1.78
5ggl	1.78
2zgm	1.79
1ga8	1.8
3rxh	1.8
1af6	1.82
1bra	1.82
1d5r	1.82
1y1m	1.82
3eqb	1.82
4ahv	1.82
1rdn	1.84
1fd7	1.85
3khv	1.85
1tnl	1.88
2ay2	1.88
4x8s	1.89
1f2p	1.9
4mrh	1.9
1f2o	1.91
1efi	1.92
3ehn	1.92
4bh3	1.92
2rjr	1.94
5nn4	1.94
4mrf	1.95
1tnj	1.96
2gga	1.96
1wdq	1.98
3i3d	1.99
1gbt	2
1ing	2
2bmv	2
2hds	2
2r58	2
3c2f	2
3g2y	2
3pce	2
3rv3	2
4awj	2
4ctk	2
4kz5	2
4qsu	2
4qsv	2
4u58	2
4y4g	2
4ty8	2.03
5ekx	2.03
5nzq	2.03
1jfh	2.05
4e4a	2.05
4ty9	2.05
4x8t	2.05
5eiw	2.05
1qq9	2.06
1rdi	2.06
2zg3	2.06
4u54	2.06
3ao4	2.07
4b0c	2.07
3rxp	2.08
5tyh	2.08
1njj	2.1
2zg1	2.1
4aml	2.1
4cs9	2.1
3uf9	2.11
1qx1	2.12
2w8w	2.12
3gv9	2.12
1p2g	2.13
1uxb	2.15
3rxg	2.15
4b0j	2.15
4q90	2.15
5cs3	2.15
2ay9	2.16
4tim	2.16
5fe6	2.16
3gqz	2.17
4y3j	2.17
3l7d	2.18
4ahr	2.19
4ahs	2.19
4amx	2.19
4jdf	2.19
4mre	2.19
5nzp	2.19
1w1v	2.2
2vvo	2.2
4eh8	2.2
1x8d	2.21
4g0z	2.21
1icj	2.22
1m0n	2.22
2aac	2.22
4aci	2.22
4uru	2.22
4ury	2.22
4x11	2.22
5hcl	2.22
5jqb	2.22
1ajp	2.23
2igv	2.23
3ao5	2.23
3i3b	2.23
1rdl	2.24
2ay8	2.24
2os9	2.24
5f6v	2.24
5m9w	2.24
5nzo	2.24
1ukt	2.25
1ew8	2.26
3ao1	2.26
4eh9	2.26
4np2	2.26
5v6u	2.26
1hge	2.27
1uto	2.27
4ahu	2.27
4mfe	2.27
1ps3	2.28
2rjs	2.28
3fu0	2.28
3ip8	2.28
2ay1	2.29
4ddk	2.29
4ehv	2.29
5fnj	2.29
1hyv	2.3
1inh	2.3
1jdj	2.3
1n1g	2.3
1o4g	2.3
1uxa	2.3
1w1p	2.3
2ay7	2.3
2hdu	2.3
2xix	2.3
2xlc	2.3
3dyo	2.3
3kgq	2.3
3mhw	2.3
3pcg	2.3
3rv4	2.3
4b6e	2.3
4e3d	2.3
4g0y	2.3
4jsz	2.3
4led	2.3
4wh7	2.3
5enc	2.3
5eni	2.3
5enj	2.3
5g42	2.3
1m0o	2.31
4y0a	2.31
5mz8	2.31
2qve	2.32
5aol	2.32
1z6d	2.34
4iie	2.34
5elf	2.34
1qi0	2.35
3gtc	2.35
4k3k	2.35
4y3y	2.35
1o4j	2.36
3g2z	2.36
3t0d	2.37
4jck	2.37
6rnt	2.37
3f6e	2.38
4aj2	2.38
1f73	2.39
1nwl	2.39
4nyt	2.39
4tya	2.39
2wi1	2.4
3dxg	2.4
3l7b	2.4
3pcb	2.4
3t2t	2.4
4u5l	2.4
4y38	2.4
4zsm	2.4
1o4r	2.41
2wsx	2.41
4u5s	2.41
4u5o	2.42
5os3	2.43
1o4h	2.44
1oba	2.44
1t4s	2.44
2i2b	2.44
2xiy	2.44
3ked	2.44
3l7c	2.44
3mjl	2.44
4d62	2.44
1o4o	2.46
2aez	2.46
3l79	2.46
4ah9	2.46
4ddm	2.46
4eh6	2.46
4x8u	2.46
5aqh	2.46
1tok	2.47
1utl	2.47
3rik	2.47
4gne	2.47
4y4j	2.47
5dv4	2.47
5jal	2.47
1gyx	2.48
4u5n	2.48
4ze6	2.48
5mn1	2.48
5mnb	2.48
5mnx	2.48
5mon	2.48
1o4q	2.49
4efk	2.49
4ej2	2.49
4kz7	2.49
1ai4	2.5
3g30	2.51
4ctj	2.51
1rq2	2.52
1wdr	2.52
3ad7	2.52
3bf1	2.52
3fq7	2.52
3gr2	2.52
3mfv	2.52
3vdb	2.52
4e3f	2.52
4g0q	2.52
4urz	2.52
5f6d	2.52
5f6u	2.52
4hj2	2.53
1iup	2.54
1il3	2.55
1kf0	2.55
3b3s	2.55
3ovn	2.55
5eif	2.55
5n53	2.55
5os0	2.55
1gwv	2.57
2ria	2.57
2wq4	2.57
3kgp	2.57
5v4q	2.57
2ay5	2.59
3gvb	2.59
4o3a	2.59
4o3c	2.59
4wef	2.59
5tpb	2.59
1o4p	2.6
2c4v	2.6
2r5a	2.6
3gwv	2.6
3rxf	2.6
4up5	2.6
5g46	2.6
1cze	2.62
1w1y	2.62
3f37	2.62
3f38	2.62
3fk1	2.62
3rxl	2.62
4lnf	2.62
4lno	2.62
5foo	2.62
5lvd	2.62
1ajn	2.63
1g5f	2.64
1o4i	2.64
3p1d	2.64
4i8x	2.64
4q7w	2.64
4q8y	2.64
4ufl	2.64
5ey0	2.65
1il5	2.66
3a1e	2.66
3rxb	2.66
4y2p	2.66
5eld	2.66
3lvw	2.67
1hgi	2.68
1o8b	2.68
2q72	2.68
3rxk	2.68
4b3c	2.68
4b3d	2.68
5aqj	2.68
5aqp	2.68
3elc	2.69
4usw	2.69
5k5s	2.69
1br5	2.7
1gym	2.7
1lt5	2.7
1tc1	2.7
1ylv	2.7
2fzc	2.7
2ha4	2.7
2ohk	2.7
2ow6	2.7
2uyn	2.7
3bra	2.7
3ftz	2.7
3fud	2.7
3fuf	2.7
3fuh	2.7
3gk2	2.7
3gsg	2.7
3hvg	2.7
3rqw	2.7
3sl0	2.7
3zsw	2.7
3zsz	2.7
3zt1	2.7
4h4b	2.7
4okp	2.7
4old	2.7
4wks	2.7
4ypf	2.7
4yrc	2.7
4yrg	2.7
4yrr	2.7
5aok	2.7
4kpz	2.71
1pfu	2.72
2rkd	2.72
3p4r	2.72
5fsx	2.72
1dg9	2.74
2qwb	2.74
2vyt	2.74
4m6u	2.74
4ndu	2.74
5os2	2.74
1rql	2.75
1ny2	2.76
4bt5	2.76
5er4	2.76
2bet	2.77
2p3o	2.77
3fcq	2.77
3l0n	2.77
4g5y	2.77
4kz3	2.77
4urv	2.77
4ykk	2.77
5aqn	2.77
5oug	2.77
2yiv	2.78
3ftw	2.78
4yrt	2.78
5os4	2.78
2bge	2.8
2bza	2.8
3zt4	2.8
4kz8	2.8
4urw	2.8
4yw2	2.8
5fbi	2.8
5fov	2.8
5hki	2.8
5ofw	2.8
3djx	2.81
4eh4	2.81
4oyt	2.81
4rrg	2.81
1czc	2.82
1p17	2.82
2a3a	2.82
2rib	2.82
2w6z	2.82
2xj0	2.82
2yc0	2.82
3fue	2.82
3lka	2.82
3ppr	2.82
4dsu	2.82
4k7i	2.82
4pb1	2.82
4z46	2.82
5aip	2.82
4yz5	2.83
3fu3	2.84
3moh	2.84
3zt2	2.84
4cgj	2.84
1il4	2.85
2ork	2.85
3atk	2.85
3k3g	2.85
3rxa	2.85
3udh	2.85
4luv	2.85
4mlt	2.85
4x47	2.85
4ym2	2.85
5aqo	2.85
5th4	2.85
3qx8	2.86
3zt3	2.86
4ouj	2.86
4pd5	2.86
4fgz	2.87
5thj	2.87
1e34	2.88
2woq	2.88
4ucv	2.88
1cet	2.89
1iih	2.89
1ugp	2.89
2wpb	2.89
2wtx	2.89
3f36	2.89
3g31	2.89
4b35	2.89
4cd8	2.89
4gqq	2.89
4kzb	2.89
4llx	2.89
4u5u	2.89
4urx	2.89
5aes	2.89
5flt	2.89
5ngz	2.89
5orv	2.89
6b7b	2.89
3c2u	2.9
5aom	2.9
5dv2	2.9
1ms0	2.91
2ay4	2.91
2pri	2.91
4kc1	2.91
1eef	2.92
1h2k	2.92
1o4k	2.92
1p6e	2.92
1zp5	2.92
2aa9	2.92
2aay	2.92
2fkf	2.92
2fw6	2.92
2fwp	2.92
3alt	2.92
3iaf	2.92
3k8c	2.92
4ai5	2.92
4ef6	2.92
4lm3	2.92
4u4s	2.92
4x14	2.92
4y2q	2.92
4zki	2.92
5c0k	2.92
5ct2	2.92
5x4m	2.92
1tng	2.93
3ftv	2.93
4zv2	2.93
1p6d	2.94
2vmc	2.94
4y62	2.95
1f4e	2.96
1w1t	2.96
1ykp	2.96
2br6	2.96
2w8j	2.96
3g34	2.96
3imc	2.96
3img	2.96
4bgy	2.96
4dst	2.96
4k3l	2.96
4mrg	2.96
4owm	2.96
5fng	2.96
2hw2	2.97
4ceb	2.97
5flq	2.97
3ckb	2.98
3djq	2.98
4ibc	2.98
5aba	2.98
5aqu	2.98
3ump	2.99
4bps	2.99
1ecq	3
1hqg	3
1mcz	3
1ux7	3
1w7h	3
1wbg	3
1wbo	3
1ws4	3
1yc5	3
1z9h	3
1zm7	3
2f1b	3
2h2e	3
2q8h	3
2r0y	3
2rka	3
2v3u	3
2vin	3
2vtm	3
2wa3	3
2xgm	3
2xgo	3
2xp3	3
2ych	3
3ap7	3
3d9o	3
3eka	3
3grj	3
3ime	3
3nf8	3
3nk8	3
3ob0	3
4b2i	3
4fe9	3
4k0o	3
4k5z	3
4k64	3
4k72	3
4l51	3
4l5j	3
4lkh	3
4llk	3
4m5r	3
4o7d	3
4oyp	3
4oz2	3
4r3w	3
4txs	3
4u0w	3
4wh9	3
5a5o	3
5aqr	3
5c7b	3
5ehw	3
5fnq	3
5jah	3
5l97	3
5lz2	3
5tpc	3
5u66	3
1g42	3.01
1utm	3.01
4g0p	3.01
5jan	3.01
2vmd	3.02
3dc2	3.02
3fuk	3.02
4q81	3.02
4xm8	3.02
1ogd	3.03
1ws5	3.03
2ggu	3.03
2ha3	3.03
3adv	3.03
3esj	3.03
4lm2	3.03
4qp2	3.03
5aoi	3.03
1rtf	3.04
2pcu	3.04
3ay0	3.04
3t08	3.04
3t1m	3.04
3zvv	3.04
4i7k	3.04
4lm4	3.04
5fls	3.04
1f74	3.05
1gvk	3.05
1gzg	3.05
1o41	3.05
1pum	3.05
1uj5	3.05
1uj6	3.05
2ohl	3.05
2vcw	3.05
4g5f	3.05
4guj	3.05
4u5v	3.05
5abe	3.05
5ort	3.05
2jfh	3.06
3atm	3.06
3hw1	3.06
3rxi	3.06
3rxj	3.06
4csy	3.06
4nyi	3.06
1rnm	3.07
1s26	3.07
3mof	3.07
4yrs	3.07
1hiy	3.08
1y1z	3.08
4yv1	3.08
5ehv	3.08
1mdl	3.09
1ugw	3.09
4eh5	3.09
1a5v	3.1
1af2	3.1
1ec9	3.1
1pu7	3.1
1pu8	3.1
1swi	3.1
2xdl	3.1
3buf	3.1
3f78	3.1
3mo8	3.1
4cjr	3.1
4j79	3.1
4kz6	3.1
4pl6	3.1
4pxf	3.1
4y2j	3.1
4y64	3.1
5aqq	3.1
5cr7	3.1
5eh8	3.1
5ggo	3.1
5lzg	3.1
5lzh	3.1
5orw	3.1
1k2i	3.11
1uod	3.11
2ay6	3.11
3c2r	3.11
3msj	3.11
4aj1	3.11
4ajk	3.11
4d52	3.11
4gbz	3.11
4wf4	3.11
5enb	3.11
1h9l	3.12
4bt3	3.12
4cgi	3.12
4uct	3.12
5ey4	3.12
1ax0	3.13
3kac	3.13
5c5t	3.13
2f1a	3.14
2ya7	3.14
3odk	3.14
4b34	3.14
1e6q	3.15
1eei	3.15
1noi	3.15
1noj	3.15
1nok	3.15
1rin	3.15
2fr8	3.15
2p8n	3.15
3cgy	3.15
3e73	3.15
4de5	3.15
4fzj	3.15
4lw1	3.15
4x0z	3.15
5e5g	3.15
5flo	3.15
5fnf	3.15
2ymd	3.16
3ad8	3.16
3ecn	3.16
3f34	3.16
3f35	3.16
3kpu	3.16
3lk0	3.16
4eh2	3.16
4pli	3.16
5n1x	3.16
4hnc	3.17
4uce	3.17
4x3i	3.17
5fot	3.17
5fox	3.17
5ose	3.17
1b9s	3.18
1lbk	3.18
1ro7	3.18
2wik	3.18
3at1	3.18
3bug	3.18
3kid	3.18
1o6i	3.19
2zdx	3.19
3dxh	3.19
3g1v	3.19
4gzx	3.19
4mlx	3.19
1axz	3.2
2w0x	3.2
2wij	3.2
3kab	3.2
4nrm	3.2
5cs6	3.2
5d9p	3.2
5flp	3.2
1s5z	3.21
3fty	3.21
5mwo	3.21
5osd	3.21
6tim	3.21
1br6	3.22
1e6s	3.22
1e72	3.22
1evh	3.22
1ew9	3.22
1k1y	3.22
1qwu	3.22
1tog	3.22
1x6u	3.22
1zc9	3.22
2bv4	3.22
2ri9	3.22
2uy3	3.22
3aru	3.22
3i8t	3.22
4n5d	3.22
4tyl	3.22
4wn0	3.22
5n1y	3.22
1px4	3.23
2gmk	3.23
3zsy	3.23
4kc4	3.23
4lm1	3.23
4unp	3.23
5ene	3.23
2r8q	3.24
3qfz	3.24
4b2l	3.24
4k60	3.24
4luo	3.24
4qlk	3.24
4y2u	3.24
5o0a	3.24
1v2j	3.25
3ta1	3.25
4lm0	3.25
4zij	3.25
1l5s	3.26
3t1l	3.26
4egh	3.26
4k66	3.26
4wkt	3.26
5yas	3.26
1axr	3.27
3ioe	3.27
4jbl	3.27
5jzs	3.27
5kdf	3.27
1bcu	3.28
1g9t	3.28
1x07	3.28
2xgs	3.28
3d52	3.28
3ms4	3.28
3tfu	3.28
3zsx	3.28
4eh7	3.28
4fl1	3.28
4yv0	3.28
5moe	3.28
5odu	3.28
1ax1	3.29
4f20	3.29
5duw	3.29
1d7j	3.3
1lt6	3.3
1o4e	3.3
1phw	3.3
1tpw	3.3
1zd2	3.3
1zd3	3.3
2aq7	3.3
2aqb	3.3
2hd1	3.3
2uxx	3.3
2vw2	3.3
2w0s	3.3
2xml	3.3
3aaq	3.3
3avg	3.3
3avh	3.3
3avi	3.3
3avj	3.3
3avk	3.3
3avm	3.3
3avn	3.3
3ch9	3.3
3gv6	3.3
3h2c	3.3
3hcm	3.3
3i90	3.3
3i91	3.3
3l7g	3.3
3n1v	3.3
3n1w	3.3
3n3l	3.3
3n45	3.3
4b6f	3.3
4ddh	3.3
4gj8	3.3
4gj9	3.3
4j58	3.3
4jss	3.3
4mrw	3.3
4msa	3.3
4np3	3.3
4ojq	3.3
4oue	3.3
4tz8	3.3
4u6e	3.3
4ucr	3.3
4x13	3.3
5ejw	3.3
5g45	3.3
5ggp	3.3
5l96	3.3
5mgg	3.3
5mgl	3.3
5mgm	3.3
5mt0	3.3
5mt4	3.3
5v19	3.3
5vdo	3.3
5vdr	3.3
5vds	3.3
1i2s	3.31
1pzp	3.31
3msc	3.31
4kc2	3.31
5c7a	3.31
5fe7	3.31
5l98	3.31
5os1	3.31
1pzo	3.32
2wk6	3.32
4cjp	3.32
4i7j	3.32
5l99	3.32
5tg4	3.32
188l	3.33
1jlr	3.33
2a3b	3.33
2pnc	3.33
4ab9	3.33
4b0b	3.33
4b5t	3.33
4b5w	3.33
4k2y	3.33
4pd9	3.33
2xoi	3.34
3f33	3.34
3ry8	3.34
4b32	3.34
4bt4	3.34
4cp5	3.34
4gwk	3.34
4yuy	3.34
5ehi	3.34
2qcm	3.35
3c2o	3.35
3pwk	3.35
3zxe	3.35
4gnf	3.35
4joh	3.35
4lkq	3.35
4u7o	3.35
4ucu	3.35
4wet	3.35
1ahy	3.36
2ha7	3.36
2pvv	3.36
2vc7	3.36
3av9	3.36
3zzh	3.36
4cj4	3.36
4wyp	3.36
5orz	3.36
187l	3.37
1tnh	3.37
1v2u	3.37
1v2v	3.37
2c6g	3.37
3d8z	3.37
3n35	3.37
4b33	3.37
4mrd	3.37
1z34	3.38
2fzg	3.38
3a73	3.38
3tay	3.38
3w07	3.38
4qll	3.38
5l8o	3.38
1toj	3.39
2j9h	3.39
3mrx	3.39
4ipn	3.39
4lhm	3.39
4ms0	3.39
5jzb	3.39
5lsh	3.39
5mxk	3.39
5os5	3.39
1bxr	3.4
1f8d	3.4
1hxk	3.4
1ikt	3.4
1il9	3.4
1jt1	3.4
1l83	3.4
1m83	3.4
1uz4	3.4
1way	3.4
220l	3.4
223l	3.4
2jbu	3.4
2q8i	3.4
2qcd	3.4
3d8y	3.4
3jzh	3.4
3k26	3.4
4abe	3.4
5afl	3.4
5uah	3.4
2v2c	3.41
3nba	3.41
4yas	3.41
1hyz	3.42
2qtn	3.42
2sim	3.42
2w08	3.42
3iob	3.42
3kqp	3.42
3muk	3.42
3px9	3.42
4c71	3.42
4d8a	3.42
4llj	3.42
4mi9	3.42
4n8q	3.42
5i38	3.42
1kti	3.43
2c57	3.43
2wig	3.43
2xog	3.43
3axz	3.43
3ms7	3.43
4k67	3.43
4kw6	3.43
5aqv	3.43
5ehg	3.43
2xp5	3.44
3as2	3.44
4b4n	3.44
4umc	3.44
3nik	3.45
4c6z	3.45
5ory	3.45
1moq	3.46
1t48	3.46
1wcc	3.46
2wi2	3.46
2wi3	3.46
3blu	3.46
3dla	3.46
3muz	3.46
3nil	3.46
3nuy	3.46
4bhf	3.46
4gby	3.46
4k5p	3.46
4nrq	3.46
4qp6	3.46
4tz2	3.46
3mtd	3.47
3nf7	3.47
3ta0	3.47
4d2d	3.47
4epy	3.47
4h42	3.47
5ai4	3.47
5ma7	3.47
1osv	3.48
1tsi	3.48
2c90	3.48
2f10	3.48
2p3i	3.48
3d9m	3.48
3g1d	3.48
3gx0	3.48
3nyd	3.48
4k7n	3.48
5eh7	3.48
5fni	3.48
5xg5	3.48
1c5o	3.49
1gzc	3.49
1pzj	3.49
1utn	3.49
2ggx	3.49
2qcf	3.49
3d1v	3.49
4avs	3.49
4b5s	3.49
4nyj	3.49
5ak6	3.49
5eok	3.49
5fnd	3.49
5i25	3.49
3fcl	3.5
4i7p	3.5
4n3w	3.5
4wey	3.5
1gz9	3.51
2ohm	3.51
2r0h	3.51
3nus	3.51
4lpf	3.51
5aqt	3.51
5cp9	3.51
5dtt	3.51
5h1u	3.51
5m4q	3.51
5orx	3.51
1imx	3.52
1jys	3.52
1o4d	3.52
1o4f	3.52
2fyv	3.52
2j27	3.52
2vw1	3.52
3c14	3.52
3lcu	3.52
3mfw	3.52
3qw6	3.52
3tf7	3.52
3zlv	3.52
3zly	3.52
4c70	3.52
4eky	3.52
4g93	3.52
4hv7	3.52
4mrz	3.52
4oyo	3.52
4y5i	3.52
5mod	3.52
5vfn	3.52
2b4m	3.53
2y67	3.53
3avf	3.53
3h06	3.53
3nf6	3.53
4eh3	3.53
4nmr	3.53
4orx	3.53
4ory	3.53
185l	3.54
1vjd	3.54
2jbv	3.54
2o9v	3.54
3blt	3.54
3bm8	3.54
3nf9	3.54
3obq	3.54
4gng	3.54
5ggk	3.54
5v2l	3.54
1v2r	3.55
2ay3	3.55
2cle	3.55
2clf	3.55
2clm	3.55
2hwg	3.55
2qwc	3.55
2xah	3.55
3pjg	3.55
3qvu	3.55
4aji	3.55
4k3m	3.55
4mjr	3.55
4n98	3.55
4nym	3.55
5av0	3.55
5btx	3.55
5dts	3.55
5dva	3.55
5fpk	3.55
5l8t	3.55
5vkm	3.55
2hrm	3.56
2ycm	3.56
4joe	3.56
1h46	3.57
1jwm	3.57
1np0	3.57
3ej5	3.57
3ff3	3.57
4abg	3.57
4ck3	3.57
4ibb	3.57
4q8x	3.57
4xm7	3.57
5a7b	3.57
5csh	3.57
5enf	3.57
5jz9	3.57
1vjc	3.58
3dx1	3.58
4g19	3.58
4y63	3.58
5q1g	3.58
5ual	3.58
1gww	3.59
1nli	3.59
2gsu	3.59
2nn8	3.59
2pgj	3.59
2pgl	3.59
3sl1	3.59
3x1k	3.59
4cd6	3.59
4cjq	3.59
4k3r	3.59
4q7v	3.59
5mxf	3.59
1bo5	3.6
1d1p	3.6
1d7i	3.6
1qw7	3.6
1uys	3.6
1w31	3.6
1zd4	3.6
2bgr	3.6
2fzk	3.6
2oq6	3.6
2q6h	3.6
2qch	3.6
2qpu	3.6
2wp1	3.6
2xdk	3.6
2y68	3.6
3afk	3.6
3b3x	3.6
3bb1	3.6
3g0i	3.6
3jdw	3.6
3kn0	3.6
3m3o	3.6
3pke	3.6
3t2p	3.6
4b3b	3.6
4c1y	3.6
4meo	3.6
4meq	3.6
5dqf	3.6
5lvr	3.6
5ujv	3.6
8gpb	3.6
1g9s	3.61
2vfz	3.61
3ftu	3.61
3jzj	3.61
3sk2	3.61
4a4c	3.61
4ln2	3.61
4qp1	3.61
5c91	3.61
5lud	3.61
5thi	3.61
1pb9	3.62
3pcc	3.62
3st6	3.62
3udj	3.62
4bkt	3.62
4fxj	3.62
4nrc	3.62
4rrf	3.62
4wy3	3.62
4yym	3.62
3fuj	3.63
3jpx	3.63
3rxm	3.63
4mm7	3.63
5dqe	3.63
1gyy	3.64
2azr	3.64
2pem	3.64
2qwg	3.64
2rk8	3.64
3px8	3.64
4bdi	3.64
4gui	3.64
4iuo	3.64
5hog	3.64
1b9v	3.65
3vws	3.65
4agl	3.65
4y4v	3.65
5aqk	3.65
1l6y	3.66
2qv7	3.66
2v00	3.66
3buh	3.66
3ex6	3.66
3iny	3.66
3oy8	3.66
3pcn	3.66
3t2q	3.66
3tsd	3.66
4aia	3.66
4fl2	3.66
5b6c	3.66
5ggn	3.66
5m17	3.66
2bve	3.67
3fts	3.67
3h2m	3.67
3h2n	3.67
4cig	3.67
4ibd	3.67
4lnp	3.67
4mww	3.67
4n99	3.67
5er5	3.67
5fog	3.67
5fol	3.67
5vdq	3.67
1c3x	3.68
1qsc	3.68
2x6x	3.68
2za3	3.68
3ioc	3.68
3isj	3.68
3uwl	3.68
4aje	3.68
4io7	3.68
4isu	3.68
4mx1	3.68
4oru	3.68
5f3t	3.68
2a8g	3.69
3clp	3.69
3d7b	3.69
4gwi	3.69
4ovg	3.69
4tte	3.69
5ai0	3.69
5dkn	3.69
1bcj	3.7
1e37	3.7
1fwu	3.7
1gz3	3.7
1gz4	3.7
1h0r	3.7
1i43	3.7
1loq	3.7
1pdz	3.7
1uy6	3.7
1uy7	3.7
1uyd	3.7
1uye	3.7
1w70	3.7
1wht	3.7
2bjm	3.7
2bmz	3.7
2bvr	3.7
2fx6	3.7
3ex2	3.7
3ful	3.7
3kd7	3.7
3l59	3.7
3mrt	3.7
3n7a	3.7
3zlw	3.7
4ayt	3.7
4ayx	3.7
4b2d	3.7
4kza	3.7
4l7h	3.7
4l7j	3.7
4o4k	3.7
4pji	3.7
5c6o	3.7
5c6p	3.7
5c87	3.7
5dy7	3.7
5dya	3.7
5em3	3.7
5eva	3.7
5ewd	3.7
5g43	3.7
5hn0	3.7
5j41	3.7
5jer	3.7
5vdu	3.7
5vdv	3.7
5vdw	3.7
2vfk	3.71
3fj7	3.71
3g32	3.71
3wkc	3.71
4k5m	3.71
4mjq	3.71
1ai5	3.72
1fwv	3.72
1grp	3.72
1ugy	3.72
2am4	3.72
2h9p	3.72
2r23	3.72
2yde	3.72
3f5l	3.72
3ms2	3.72
3q6z	3.72
4jog	3.72
4tk1	3.72
4tk2	3.72
4tln	3.72
4ufm	3.72
5enh	3.72
1b2m	3.73
2vta	3.73
3ati	3.73
3fjg	3.73
3h91	3.73
3rxd	3.73
4fz3	3.73
4y5s	3.73
1f5k	3.74
1ihy	3.74
1oh4	3.74
2dwx	3.74
2wq5	3.74
2xp4	3.74
3kpv	3.74
3mrv	3.74
3v30	3.74
4bv2	3.74
4pre	3.74
4yk0	3.74
4yux	3.74
5a7c	3.74
5khj	3.74
2iyf	3.75
2pyi	3.75
3d6p	3.75
3gep	3.75
4kov	3.75
5l4h	3.75
5ldo	3.75
2x09	3.76
3d6q	3.76
4c6x	3.76
4tu4	3.76
4w52	3.76
5jid	3.76
5x9h	3.76
6bhh	3.76
1kui	3.77
1mpl	3.77
2uuo	3.77
2v2h	3.77
2xaj	3.77
2y9g	3.77
3ao2	3.77
3fum	3.77
3hav	3.77
3kqm	3.77
3nuu	3.77
3s0j	3.77
3vi2	3.77
3wkd	3.77
4j86	3.77
4k8o	3.77
4q46	3.77
4w5a	3.77
5ewh	3.77
5h7h	3.77
5orr	3.77
5v8o	3.77
3nq3	3.78
3qi3	3.78
4dhm	3.78
4klv	3.78
4tnw	3.78
5aqf	3.78
1wbv	3.79
2clk	3.79
2xtk	3.79
4xqb	3.79
5etf	3.79
1kug	3.8
1li6	3.8
1nje	3.8
1ybo	3.8
2ggd	3.8
2hb1	3.8
3as3	3.8
3nfk	3.8
3q2m	3.8
3t09	3.8
3vv6	3.8
3zlx	3.8
4ajl	3.8
4odk	3.8
4umr	3.8
5aib	3.8
5ech	3.8
5eci	3.8
5h1t	3.8
5lg3	3.8
5uf0	3.8
2hu6	3.81
2o9a	3.81
2ou7	3.81
3ai8	3.81
3lce	3.81
4q9s	3.81
5wbf	3.81
1hn4	3.82
2gfj	3.82
3g2h	3.82
3sgt	3.82
3tiz	3.82
3ud5	3.82
4aba	3.82
4bks	3.82
4egi	3.82
4fl3	3.82
4keq	3.82
4mmm	3.82
4y2t	3.82
5d7e	3.82
5vfm	3.82
1r0x	3.83
1r10	3.83
1yhm	3.83
2osf	3.83
4ozo	3.83
1bky	3.84
1j15	3.84
1j16	3.84
1utj	3.84
3ck8	3.84
3lzz	3.84
3ril	3.84
4bt9	3.84
4ce2	3.84
4d9p	3.84
4kv9	3.84
5acw	3.84
6eks	3.84
1n1t	3.85
1n1v	3.85
1sre	3.85
1vcu	3.85
2vhq	3.85
2wzs	3.85
2yb0	3.85
3kqo	3.85
3mv0	3.85
3wq5	3.85
4ivk	3.85
4kiu	3.85
5btv	3.85
5dhp	3.85
5tha	3.85
5wkh	3.85
3lbz	3.86
3rtx	3.86
3spf	3.86
4bnt	3.86
4i9u	3.86
5dtq	3.86
5g4m	3.86
5ldm	3.86
5wxg	3.86
1aj7	3.87
1v16	3.87
2f6y	3.87
2y55	3.87
3g2l	3.87
3h03	3.87
3npa	3.87
3w5n	3.87
3wjw	3.87
4ab8	3.87
4ijl	3.87
4nbk	3.87
5iyv	3.87
5wkf	3.87
6b7f	3.87
3dda	3.88
3si4	3.88
4mjp	3.88
4prb	3.88
5afk	3.88
5eqe	3.88
5lm4	3.88
5mk1	3.88
1m0q	3.89
1xfv	3.89
2ctc	3.89
2x85	3.89
2xiz	3.89
3iae	3.89
3obx	3.89
3src	3.89
3ti1	3.89
3u4i	3.89
3umo	3.89
4aj4	3.89
4dgb	3.89
4dhn	3.89
4lqy	3.89
4nl1	3.89
4ufk	3.89
5etu	3.89
5kde	3.89
1avn	3.9
1exw	3.9
1slg	3.9
2gvv	3.9
2qw1	3.9
2rkm	3.9
2vhj	3.9
2vuk	3.9
2wor	3.9
2wos	3.9
2xel	3.9
2xpc	3.9
3wk7	3.9
3zj8	3.9
3zvw	3.9
4k5n	3.9
4kqq	3.9
4kqr	3.9
4men	3.9
4n9c	3.9
4qgi	3.9
5ai8	3.9
5lzj	3.9
9icd	3.9
1kuk	3.91
2oei	3.91
2vte	3.91
3l5b	3.91
5b1s	3.91
1ahx	3.92
1pr5	3.92
2vth	3.92
2yim	3.92
3ap4	3.92
3fgc	3.92
3gk4	3.92
3twp	3.92
3uih	3.92
3zhf	3.92
4i2w	3.92
4pd7	3.92
5axi	3.92
5hn7	3.92
5t1i	3.92
1h5v	3.93
2a5b	3.93
2cbz	3.93
3jvk	3.93
3qi4	3.93
4dho	3.93
1v1m	3.94
1z3t	3.94
2h9n	3.94
2v3d	3.94
3bwk	3.94
3pp7	3.94
3t0m	3.94
4fcm	3.94
4hv3	3.94
4k3q	3.94
4kva	3.94
4rgd	3.94
5lws	3.94
2xvn	3.95
3c0z	3.95
3fsj	3.95
3kze	3.95
4bi6	3.95
5f5b	3.95
5fou	3.95
5izc	3.95
5m5d	3.95
1mrs	3.96
1x9d	3.96
2ad5	3.96
2fpz	3.96
2vi5	3.96
2wec	3.96
3c39	3.96
3gt9	3.96
3h2a	3.96
3uxg	3.96
4ac3	3.96
4ce3	3.96
4gqr	3.96
4joj	3.96
4yyn	3.96
4zmf	3.96
5c3k	3.96
5ofx	3.96
1ai6	3.97
1l5q	3.97
2flh	3.97
3fu6	3.97
4aa2	3.97
4agn	3.97
4ibg	3.97
4twy	3.97
1v11	3.98
2uup	3.98
3b3c	3.98
4agm	3.98
4k5o	3.98
5c7f	3.98
5c85	3.98
5f2w	3.98
5jdc	3.98
5jek	3.98
1ax2	3.99
1rpf	3.99
2g8r	3.99
2q8y	3.99
3chg	3.99
4edu	3.99
4i7l	3.99
4u2y	3.99
4w53	3.99
5jim	3.99
5t70	3.99
1a7c	4
1a86	4
1e5j	4
1gfz	4
1jyi	4
1kqb	4
1lgw	4
1mx1	4
1nu3	4
1s9v	4
1tlo	4
1tni	4
1utt	4
1wc1	4
1wc6	4
1z3c	4
2bow	4
2brp	4
2buv	4
2c8y	4
2j9l	4
2ja3	4
2ohr	4
2ot1	4
2qcg	4
2qrl	4
2rin	4
2whp	4
3a1c	4
3c4e	4
3fck	4
3ijh	4
3qzt	4
3r9h	4
3r9o	4
3rpr	4
3rzb	4
3tvl	4
3vd9	4
4ai8	4
4ayw	4
4bcw	4
4cfu	4
4gjb	4
4gxs	4
4iz0	4
4l7g	4
4p6c	4
4tuh	4
4ucd	4
4umb	4
4usj	4
4wym	4
4ylu	4
5a5p	4
5akk	4
5bvk	4
5f04	4
5f0c	4
5f27	4
5fpp	4
5g4n	4
5h1v	4
5j6s	4
5jao	4
5jv2	4
5kql	4
5mgk	4
5npc	4
5npe	4
5wcm	4
1b42	4.01
1c5z	4.01
1v2w	4.01
2aoi	4.01
2vtl	4.01
2xz5	4.01
3fzn	4.01
3kqw	4.01
3s3k	4.01
4eym	4.01
5auz	4.01
5hlb	4.01
5hn8	4.01
5tg5	4.01
2wvz	4.02
3as1	4.02
3ddb	4.02
3np7	4.02
3po1	4.02
3ztd	4.02
4k8a	4.02
5e3d	4.02
5glu	4.02
5thn	4.02
5u5k	4.02
5vsj	4.02
2ohp	4.03
2q8m	4.03
2qrm	4.03
2w0z	4.03
2x96	4.03
3bxh	4.03
3mt7	4.03
3nq9	4.03
3ueo	4.03
4bi2	4.03
4kab	4.03
4msn	4.03
4pri	4.03
4wmv	4.03
5e2l	4.03
5fow	4.03
5hng	4.03
5oui	4.03
1hi5	4.04
1l7x	4.04
1li2	4.04
2c02	4.04
4nmp	4.04
4ps0	4.04
4y2v	4.04
5epr	4.04
6at0	4.04
1awi	4.05
1pwy	4.05
1r4w	4.05
1toi	4.05
1tuf	4.05
2rk7	4.05
2w66	4.05
3ck7	4.05
3d9n	4.05
3fjz	4.05
3isw	4.05
3n8k	4.05
3qx9	4.05
3thd	4.05
4xm6	4.05
4y32	4.05
5gof	4.05
5mk3	4.05
5mob	4.05
5vdp	4.05
2clh	4.06
2clo	4.06
3h2f	4.06
3m3c	4.06
4b85	4.06
4fem	4.06
5h9s	4.06
5mge	4.06
5or9	4.06
5x4o	4.06
8a3h	4.06
1at6	4.07
1gj4	4.07
1hyo	4.07
1wax	4.07
2v2v	4.07
2va5	4.07
2vtd	4.07
2wgi	4.07
2x5o	4.07
3avb	4.07
3mag	4.07
3mct	4.07
4bdb	4.07
4eft	4.07
4jok	4.07
4xmr	4.07
5mpz	4.07
5ot9	4.07
1lb6	4.08
1n2v	4.08
1y2g	4.08
1yci	4.08
2auc	4.08
2d06	4.08
2rke	4.08
2z1w	4.08
3f8w	4.08
3kwa	4.08
3r42	4.08
3rxo	4.08
4xdo	4.08
5a5z	4.08
5ksu	4.08
1ai7	4.09
1jn2	4.09
1o0n	4.09
1y2b	4.09
2v88	4.09
3chc	4.09
3g2n	4.09
3rmf	4.09
4b9z	4.09
4bdf	4.09
4c1h	4.09
4fxp	4.09
4mji	4.09
4p72	4.09
4qkd	4.09
1c5t	4.1
1gwm	4.1
1odj	4.1
1rry	4.1
1rzx	4.1
2bvs	4.1
2f18	4.1
2qiq	4.1
2qju	4.1
2uw3	4.1
2xuc	4.1
3b78	4.1
3ewz	4.1
3gk1	4.1
3iod	4.1
4c66	4.1
4cr9	4.1
4do3	4.1
4k6t	4.1
4p75	4.1
4uyd	4.1
5cc2	4.1
5hv1	4.1
5kat	4.1
5t7s	4.1
1d6s	4.11
1p19	4.11
1z3v	4.11
2c1n	4.11
2exm	4.11
2o9k	4.11
2uw8	4.11
3d6o	4.11
3l5d	4.11
3ncr	4.11
3oyw	4.11
3v4t	4.11
4bdh	4.11
4ih5	4.11
4lh6	4.11
5dnu	4.11
5e6o	4.11
5fnc	4.11
5kam	4.11
5mtv	4.11
5v8h	4.11
1bsk	4.12
1e55	4.12
1i33	4.12
1uy8	4.12
3a1d	4.12
[truncated: 15,384 more rows]

## Sheet: Table S2
CoreSet v2016
PDBID	pKd/pKi/pIC50
3ao4	2.07
3gv9	2.12
1uto	2.27
1ps3	2.28
4ddk	2.29
4jsz	2.3
3g2z	2.36
3dxg	2.4
3l7b	2.4
3gr2	2.52
3kgp	2.57
3fcq	2.77
3lka	2.82
3zt2	2.84
3udh	2.85
3g31	2.89
4llx	2.89
4u4s	2.92
4owm	2.96
5aba	2.98
2xdl	3.1
4kz6	3.1
2ymd	3.16
3aru	3.22
1bcu	3.28
3zsx	3.28
4ddh	3.3
4mrw	3.3
4eky	3.52
4mrz	3.52
4abg	3.57
5a7b	3.57
3dx1	3.58
4bkt	3.62
2v00	3.66
4cig	3.67
3n7a	3.7
3d6q	3.76
2hb1	3.8
3twp	3.92
4agn	3.97
1c5z	4.01
3nq9	4.03
4msn	4.03
2w66	4.05
3kwa	4.08
3g2n	4.09
4cr9	4.1
4ih5	4.11
4de2	4.12
3ozt	4.13
3f3a	4.19
1a30	4.3
3ivg	4.3
3u9q	4.38
3rsx	4.41
3pxf	4.43
2wbg	4.45
3rr4	4.55
4w9c	4.65
3mss	4.66
4agp	4.69
4mgd	4.69
1vso	4.72
4jxs	4.74
1q8t	4.76
3acw	4.76
4lzs	4.8
3r88	4.82
4ciw	4.82
2w4x	4.85
2brb	4.86
1p1q	4.89
3d4z	4.89
1bzc	4.92
1nc3	5
4agq	5.01
4w9l	5.02
2yge	5.06
5c1w	5.06
2r9w	5.1
3gy4	5.1
3syr	5.1
3zso	5.12
2br1	5.14
1s38	5.15
3b27	5.16
4gkm	5.17
4m0z	5.19
1w4o	5.22
3ueu	5.24
4ih7	5.24
4jfs	5.27
3ozs	5.33
3bv9	5.36
1gpk	5.37
1syi	5.44
2cbv	5.48
1ydr	5.52
4de3	5.52
3coz	5.57
2wca	5.6
3u5j	5.61
4dli	5.62
1z9g	5.64
3arv	5.64
3n86	5.64
5c28	5.66
4j28	5.7
3jvr	5.72
1o5b	5.77
2y5h	5.79
3qqs	5.82
3wz8	5.82
4dld	5.82
3ehy	5.85
3uev	5.89
3ebp	5.91
1o0h	5.92
1q8u	5.96
4de1	5.96
4msc	5.96
4w9i	5.96
3ary	6
3coy	6.02
3f3c	6.02
2fxs	6.06
4kzq	6.1
2qnq	6.11
1nc1	6.12
2wvt	6.12
1yc1	6.17
3bgz	6.26
4wiv	6.26
3k5v	6.3
4eor	6.3
3uew	6.31
2wnc	6.32
2zb1	6.32
2qbr	6.33
3arq	6.4
2j78	6.42
4ea2	6.44
1r5y	6.46
4m0y	6.46
1gpn	6.48
2weg	6.5
4kzu	6.5
4mme	6.5
3cj4	6.51
3uo4	6.52
3wtj	6.53
3jvs	6.54
1k1i	6.58
2yfe	6.63
4k77	6.63
2xj7	6.66
2iwx	6.68
4f09	6.7
4djv	6.72
4w9h	6.73
4ogj	6.79
1p1n	6.8
3dx2	6.82
2xnb	6.83
3n76	6.85
3pyy	6.86
2zcr	6.87
3oe5	6.88
3jya	6.89
3gbb	6.9
3uex	6.92
4f9w	6.94
2wer	7.05
1lpg	7.09
3zdg	7.1
1z95	7.12
1pxn	7.15
3arp	7.15
3f3d	7.16
3tsk	7.17
2j7h	7.19
2xii	7.2
4cra	7.22
4gfm	7.22
1oyt	7.24
3p5o	7.26
3gc5	7.26
2vvn	7.3
1qf1	7.32
1ydt	7.32
3pww	7.32
1owh	7.4
2zy1	7.4
3up2	7.4
4j21	7.41
2xys	7.42
2qbq	7.44
3oe4	7.47
3rlr	7.52
2xb8	7.59
2c3i	7.6
4e5w	7.66
3f3e	7.7
1u1b	7.8
3qgy	7.8
3ryj	7.8
4j3l	7.8
3prs	7.82
4pcs	7.85
4hge	7.92
1o3f	7.96
2qe4	7.96
3uuo	7.96
3cyx	8
3e92	8
3fur	8
2cet	8.02
5tmn	8.04
3ag9	8.05
3kr8	8.1
3nx7	8.1
3fv2	8.11
4eo8	8.15
3e5a	8.23
1nvq	8.25
2v7a	8.3
4x6p	8.3
1h23	8.35
4e6q	8.36
2al5	8.4
2qbp	8.4
2zda	8.4
3b68	8.4
2xbv	8.43
3b1m	8.48
2fvd	8.52
2vw5	8.52
2wn9	8.52
3ejr	8.57
4qd6	8.64
3u8k	8.66
3ge7	8.7
4crc	8.72
4ivb	8.72
2vkm	8.74
2wtv	8.74
3b5r	8.77
2zcq	8.82
3e93	8.85
4k18	8.96
2p4y	9
3dd0	9
3nw9	9
3ui7	9
3uri	9
1qkt	9.04
1h22	9.1
3gnw	9.1
1sqa	9.21
4jia	9.22
3b65	9.27
3fv1	9.3
4qac	9.4
2yki	9.46
3g0w	9.52
4ivd	9.52
4ty7	9.52
2pog	9.54
4gr0	9.55
1eby	9.7
1z6e	9.72
1e66	9.89
4ivc	10
4twp	10
4rfm	10.05
1y6r	10.11
3u8n	10.17
4tmn	10.17
2p15	10.3
3myg	10.7
4gid	10.77
3utu	10.92
5c2h	11.09
1mq6	11.15
5dwr	11.22
4f2w	11.3
2x00	11.33
3o9i	11.82
4f3c	11.82

## Sheet: Table S3
SARS-CoV PDB
PDBID
5red
5rfp
5rgi
5reu
6xfn
2zu4
5rf1
5r81
2hob
5rh6
5re6
5rff
5rek
5rfw
3sn8
6yz6
5rg3
3tit
5rf8
6xbi
6lo0
5rg1
5rha
5rea
5rfm
5rgy
5n19
5rer
6y2f
3snc
5rh3
6lu7
3vb7
5rfc
5rgo
6yvf
5reh
5rft
6xb1
4mds
6wtk
5rey
6xmk
5r7y
5rf5
5c5n
5rfj
5rgv
5reo
6xch
6xhm
5rh0
7c8u
3vb4
5rgl
5rhe
6z2e
5ree
5rfq
5rev
7brp
2zu5
3tns
5rf2
5r82
5rh7
5re7
7c7p
5rfg
5rgs
5rel
5rfx
3szn
3tiu
5rf9
7c8r
5rg2
5rhb
5reb
5rfn
5rgz
2GZ7
3v3m
5rgg
5res
6y2g
3snd
5rh4
5re4
5rfd
5rgp
3atw
5rei
5rfu
6xb2
5rez
5r7z
5rf6
6xbg
5c5o
7bqy
2z94
5rfk
5rgw
2amd
5rep
3sna
5rh1
3vb5
5rfa
4twy
5rgm
2op9
5rhf
6lnq
5ref
5rfr
5rew
2gx4
6xa4
3tnt
5rf3
5r83
5rh8
5re8
5rfh
5rgt
6lze
6m2n
5rem
5rfy
3d62
6yt8
6wnp
5rgj
5rhc
5rec
5rfo
2gz8
5rgh
5ret
6y7m
5rf0
5r80
3aw0
5rh5
5re5
5rfe
5rgq
2alv
5rej
5rfv
5rf7
6xbh
5rg0
4wy3
2v6n
5rfl
5rgx
2d2d
3snb
6m0k
6wtt
5rh2
6w63
3vb6
5rfb
5rgn
3avz
5reg
5rfs
6ynq
5n5o
6wtj
5rex
5rf4
5r84
5rh9
1wof
5re9
5rfi
5rgu
2A5I
6lny
5ren
5rfz
2qiq
7buy
7c8t
4tww
5rgk
5rhd

## Sheet: Table S4
SARS-CoV PDB-BA
PDBID	pKd/pKi/pIC50
4wy3	3.62
4twy	3.97
2qiq	4.1
3sna	4.14
2alv	4.15
4tww	4.2
3vb4	4.31
3vb7	4.31
3snb	4.38
3snc	4.39
3vb6	4.41
3snd	5.08
4mds	5.21
3aw0	5.24
2vj1	5.3
3v3m	5.32
3vb5	5.34
2gz8	5.52
3sn8	5.65
2op9	5.66
2hob	5.72
2z94	5.85
2v6n	5.86
3d62	6.1
2z9g	6.15
2gz7	6.52
2zu5	7
3atw	7.01
3avz	7.19
2zu4	7.42
6y2g	6.174
6m2n	6.027
7brp	5.38
6wtk	6.4
6wtj	6.72
6m0k	7.42
6lze	7.28
6lo0	6.08
6lny	6.29
5n19	5.71
2gx4	7.28
2amd	5.71
1wof	4.91
6wtt	7.52

## Sheet: Table S5
SARS-CoV PDB-noBA
PDBID	smiles
5rfr	CC(=O)N1CCN(CC1)Cc2sc(Br)cc2
5ret	CC(=O)N1CCN(CC1)Cc2cccc(Cl)c2
5rfu	CC(=O)N1CCN(CC1)[S](=O)(=O)c2sc(Cl)cc2
5ren	CC(=O)N1CCC[C@H](C1)c2sc3ccccc3n2
5rfm	CC(=O)N([C@H]1C[S](=O)(=O)C=C1)c2ccc(C)cc2
5rex	CC(=O)N1CCN(CC1)Cc2cccc3ccccc23
5rft	CC(=O)N1C[C@@H](c2ccccc2)c3ccccc3C1
6w63	CC(C)(C)c1ccc(cc1)N([C@@H](C(=O)NC2CCCCC2)c3cccnc3)C(=O)c4c[nH]cn4
5rfh	CC(=O)N1CCN(CC1)Cc2sc(Cl)cc2
5rek	CC(=O)N1CCN(CC1)[S](=O)(=O)c2cccc(F)c2
5rel	CC(=O)N1CCN(CC1)Cc2cccc(C)c2
5rff	CC(=O)N1CCN(CC1)[S](=O)(=O)c2ccc(Cl)cc2
5rer	CC(=O)N1CCO[C@@H](C1)c2ccc(F)cc2
5rey	CC(=O)N1CCCN(CC1)Cc2ccccc2C
5rfg	CC(=O)N([C@@H]1C[S](=O)(=O)C=C1)c2ccccc2
5rep	CC(=O)N1CCN(CC1)[S](=O)(=O)c2c(F)cccc2F
5rfp	C[C@H](NC(C)=O)c1cccc(Cl)c1
5res	CC(=O)N1CCN(CC1)[S](=O)(=O)c2ccccc2F
5rfs	CC(=O)N1CCN(CC1)Cc2cscc2
5rfi	CC(=O)N1CCN(CC1)[S](=O)(=O)c2cc(C)ccc2C
5r80	COC(=O)c1ccc(cc1)[S](N)(=O)=O
5rfw	CC(=O)N1CCN(CC1)Cc2sccc2
5rfo	CC(=O)N1CCC(CC1)C(=O)N2CCCCC2
5rej	CC(=O)N1CCN(CC1)[S](=O)(=O)c2sccc2
5rfz	CC(=O)Nc1cccnc1Cl
5rfl	CC(=O)N1CCC(CC1)C(=O)Nc2ccccc2O
5rfk	CC(=O)N1CCC(CC1)NC(=O)c2ccccc2
5rfq	CC(=O)Nc1cccc(c1)N2CCCC2=O
5reu	CC(=O)N1CCN(CC1)[S](=O)(=O)c2ccccc2C#N
5rew	C[C@@H](NC(C)=O)c1cccc2ccccc12
5r83	O=C(Nc1ccccc1)Nc2cccnc2
5rev	CC(=O)Nc1cccc(c1)C(=O)N2CCSCC2
5rfn	CC(=O)N([C@H]1C[S](=O)(=O)C=C1)c2ccc(F)cc2
5rfx	COc1ccc(cc1)N2CCN(CC2)C(C)=O
5rez	NC(=O)[C@H]1CCC[C@H]1c2cscc2
5rfe	O=C(NCc1ccc(cc1)C#N)N2CCOCC2
5r84	O=C(CC1CCCCC1)Nc2cccnc2
5re9	C[NH+]1CCN(CC1)C(=O)COc2ccc(C)cc2
5r81	CN1CCCc2ccc(cc12)[S](N)(=O)=O
5reo	CC(=O)NCc1ccc2OCOc2c1
5rf7	CN1CCN(CC1)C(=O)Cc2c[nH]c3ncccc23
5rfv	CC(=O)N1CCN(CC1)C(=O)c2sccc2
5rem	CC(=O)N1CCN(CC1)c2ccccc2[N+]([O-])=O
5r7y	C[S](=O)(=O)NCCc1ccccc1
5rea	O=C(N1CCCCCC1)c2ccc3OCOc3c2
5rfj	COc1cccc2sc(NC(C)=O)nc12
5rf1	N[S](=O)(=O)c1ccc(Br)cc1
5reb	OC1CCN(CC1)Cc2cscc2
5rfc	COC(=O)Nc1sc(C)nc1c2ccccc2
5rei	Clc1cccc(CN2CCOCC2)c1
5rfy	CC(C)N(C)C(=O)C1CCN(CC1)C(C)=O
5reh	O=C(NCCc1ccncc1)NC2CCCCC2
5rfa	Cn1ccc(n1)C(=O)NC[C@@H]2CCCO2
5rf0	OCC1(CCCC1)c2ccccn2
5reg	NC(=O)c1ccc(NC(=O)[C@@H]2CCCO2)cc1
5rf5	OC1C[S](=O)(=O)C1
5rg0	CC(=O)N1CCN(CC1)C(C)=O
5re5	NC(=O)C1CCN(CC1)C(=O)Nc2ccccc2
5rec	Oc1ccccc1CNc2[nH]c3ccccc3n2
5rf9	C[C@H]1CN(CCO1)C(=O)Cn2cccn2
5ref	COC(=O)c1cccc(N[S](C)(=O)=O)c1
5re4	CC(=O)Nc1cnccc1C
5rf8	Nc1ccc(cc1)[S](=O)(=O)Nc2ccccn2
5red	C1CN(CCO1)CCSc2ccccc2
5r7z	CC(=O)NCCc1c[nH]c2ccc(F)cc12
5re7	CC(=O)NCc1ccc(cc1)[S](N)(=O)=O
5rf6	N#Cc1ccc(cn1)N2CCCOCC2
5ree	C[C@@H]1[C@@H](O)CCCN1Cc2ccccc2
5r82	CCNc1ccc(cn1)C#N
5re6	CC(=O)Nc1ccc(Oc2ncccn2)cc1
5re8	Fc1cccc(CNCc2occc2)c1
5rfd	C[S](=O)(=O)Cc1[nH]c2ccccc2n1
5rf4	Oc1ccccn1
5rf3	Nc1cncnc1
5rfb	CCNCc1cn(C)nn1
5rf2	CCC(N)=[NH2+]
7bqy	CC(C)C[C@H](NC(=O)[C@@H](NC(=O)[C@H](C)NC(=O)c1cc(C)on1)C(C)C)C(=O)N[C@@H](C[C@@H]2CCNC2=O)\C=C/C(=O)OCc3ccccc3
5rgl	CC(=O)N1CCN(CC1)C(=O)c2ccc(C)cc2
5rgs	OC[C@H]1CN(CCO1)Cc2ccccc2
5rgi	CN(Cc1cc(C)on1)C(=O)NC2CC2
5rg2	C[C@@H](O)[C@@H](NC(C)=O)C(=O)NCC=C
5rgn	CC(=O)N1CCN(CC1)[S](=O)(=O)c2ccc(C)cc2
5rgm	CC(=O)NNC(=O)c1sc2CCCCc2c1
5rgo	CC(=O)N1CCN(CC1)C(=O)c2occc2
5rgp	CC(=O)N1CCN(CC1)[S](=O)(=O)c2ccc(C)cc2C
5rgg	CN1CCN(CC1)C(=O)Nc2ccccc2
5rg3	CC(=O)N[C@@H](CC(N)=O)C(=O)NCC=C
5rgq	Cc1cc(F)ccc1C[S](N)(=O)=O
5rgj	C1C[C@]2(CCN(C2)c3cnccn3)CO1
5rgk	Fc1ccccc1C(=O)NCCc2ccncc2
5rg1	CC(=O)N[C@@H](Cc1ccc(O)cc1)C(=O)NCC#CBr
5rgh	Cc1sc(CN2CCC=C(F)C2)nn1
5rgt	CCC(=O)N([C@@H](C(=O)NC(C)(C)C)c1cccnc1)c2cc(on2)C(C)(C)C
5rgu	O=C1C[C@H](N1)Oc2cccc(NC(=O)Cc3cncnc3)c2
5rgv	O=C(Cc1cncc2ccccc12)Nc3ccccc3
5rgw	O=C(Cc1cncc(c1)C#N)Nc2cccnc2
5rgx	Cc1ccncc1NC(=O)Cc2cccc(c2)C#N
5rgy	COc1ccnc(NC(=O)Cc2ccc3ccccc3c2)c1
5rgz	O=C(Cc1cccc(c1)C#N)Nc2cccnc2
5rh0	Cc1sc(NC(=O)Nc2cccnc2)cc1
5rh1	Clc1sc(CC(=O)Nc2cccnc2)cc1
5rh2	Cc1ccncc1NC(=O)Cc2cccc(Cl)c2
5rh3	C[C@@H](C(=O)Nc1cnccc1C)c2cccc(Cl)c2
5rh4	C[C@@H](C(O)=O)c1ccc2c([nH]c3ccc(Cl)cc23)c1
5rh5	CCC(=O)N([C@@H](C(=O)Nc1ccc(OC)cc1C)c2cccnc2)c3cc(on3)C(C)(C)C
5rh6	CCC(=O)N([C@@H](C(=O)Nc1c(C)cccc1CC)c2cccnc2)c3ccc(nc3)C(C)C
5rh7	CCC(=O)N([C@@H](C(=O)Nc1c(C)cccc1CC)c2cccnc2)c3cc([nH]n3)C(C)(C)C
5rh8	O=C(NCc1csnc1)c2ccccc2OCC#N
5rh9	CCC(=O)N([C@@H](C(=O)Nc1ccc(OC)cc1C)c2cccnc2)c3ccc(cc3)[C@H](C)OC
5rha	CC(=O)N1CCN(CC1)Cc2sccc2
5rhb	N=Cc1ncccn1
5rhc	N=Cc1[nH]ccn1
5rhd	C[S](=O)(=O)c1ccc(cc1)N2CCNCC2
5rhe	COc1ccc(NC(=O)C2CCN(CC2)C(C)=O)cn1
5rhf	CN(C(=O)C1CCN(CC1)C(C)=O)c2ccccc2
6lu7	CC(C)C[C@H](NC(=O)[C@@H](NC(=O)[C@H](C)NC(=O)c1cc(C)on1)C(C)C)C(=O)N[C@@H](C[C@@H]2CCNC2=O)\C=C/C(=O)OCc3ccccc3
6wnp	CC(C)(C)NC(=O)N[C@H](C(=O)N1C[C@H]2[C@@H]([C@H]1C(=O)N[C@@H](CC3CCC3)[C@@H](O)C(N)=O)C2(C)C)C(C)(C)C
6xa4	CSCC[C@@H](CO)NC(=O)[C@H](CC(C)C)NC(=O)[C@H](CC(C)C)NC(C)=O
6xb1	CCN1C(=O)CCC1=O
6xb2	CCN1C(=O)CCC1=O
6xbg	CC(C)C[C@H](NC(=O)OCc1ccccc1)C(=O)N[C@@H](C[C@@H]2CCNC2=O)[C@@H](O)C(=O)NC3CC3
6xbh	O=C[C@H](C[C@@H]1CCNC1=O)NC(=O)[C@H](Cc2ccccc2)NC(=O)OCc3ccccc3
6xbi	CC(C)C[C@H](NC(=O)Oc1ccccc1)C(=O)N[C@@H](CC(C)C)C(=O)N[C@@H](C[C@@H]2CCNC2=O)[C@@H](O)C(=O)NC3CC3
6xch	N[C@@H](CCCNC(N)=[NH2+])C(O)O
6xfn	OCC(O)CO
6xhm	COc1cccc2[nH]c(cc12)C(=O)N[C@@H](CC(C)C)C(=O)N[C@@H](C[C@@H]3CCNC3=O)C(=O)CO
6xmk	CC(C)C[C@H](NC(=O)OCC1CCC(F)(F)CC1)C(=O)N[C@@H](C[C@@H]2CCNC2=O)[C@@H](O)[S](O)(=O)=O
6y2f	CC(C)(C)OC(=O)NC1=CC=CN([C@@H](CC2CC2)C(=O)N[C@@H](C[C@@H]3CCNC3=O)[C@@H](O)C(=O)NCc4ccccc4)C1=O
6ynq	C[C@H]1CCc2ccccc2C1=O
6yt8	O1[Zn]Sc2cccc[n+]12
6yvf	C[C@@H](Nc1ccccc1C(O)=O)C2=CC(=CN3C(=O)C=C(N=C23)N4CCOCC4)C
6yz6	CC(C)C[C@H](NC(C)=O)C(=O)N[C@@H](CC(C)C)C(=O)N[C@@H](CCCNC(N)=[NH2+])C(O)O
6z2e	CC[C@H](NC(=O)CCOCCOCCOCCOCCNC(=O)CCCC[C@H]1[SH]=C[C@@H]2NC(=O)N[C@H]12)C(=O)N[C@H](C(=O)N[C@@H](CC(C)C)C(=O)N[C@@H](CCC(N)=O)CC[S](C)(=O)=O)C(C)(C)C
7buy	CCCCCCNC(O)=O
7c7p	CCC[C@H](NC(=O)[C@@H]1[C@H]2CCC[C@H]2CN1C(=O)[C@@H](NC(=O)[C@@H](NC(=O)c3cnccn3)C4CCCCC4)C(C)(C)C)[C@@H](O)C(=O)NC5CC5
7c8r	CCOC(=O)CC[C@H](C[C@@H]1CCNC1=O)NC(=O)[C@H](CC(C)C)NC(=O)[C@@H](NC(=O)OCc2ccccc2)[C@@H](C)OC(C)(C)C
7c8t	C[C@@H](OC(C)(C)C)[C@H](NC(=O)OCc1ccccc1)C(=O)N[C@@H](CC2CCCCC2)C(=O)N[C@H](CO)C[C@@H]3CCNC3=O

## Sheet: Table S6
SARS-CoV 2D
LIGANDID	pKd/pKi/pIC50
CHEMBL2402500	4.63581
CHEMBL4130313	5.17128
CHEMBL2402676	5.1346
CHEMBL2311700	4.40842
CHEMBL2311729	4.12235
review-com8-2m	6.12494
review-com9_10-25f	4.5376
CHEMBL235873	4.82652
CHEMBL1230135	5.04658
CHEMBL2402680	6.24954
CHEMBL378188	4.09301
CHEMBL555220	4.4671
PSI	4.98056
review-com54_30	4.61979
CHEMBL539208	3.44018
review-com13_11n	6.48149
CHEMBL477164	6.69698
review-com11_5e	6.79588
CHEMBL151	4.70183
CHEMBL2311705	4.29839
CHEMBL2402507	5.49402
PMC2597651_4	6.29355
review-com13_11o	5.07058
6y2g_11r	6.74833
CHEMBL2402508	6.37424
CHEMBL2442074	5.03924
review-com8-2l	5.72125
review-com11_5g	6.48149
CHEMBL2402682	5.07592
review-com11_5a	5.56864
review-com8-2j	7.65758
CHEMBL2402685	6.41092
review3-com13-3	4.09691
CHEMBL377324	4.51845
review-com11_5i	7.31876
CHEMBL2402503	5.76542
CHEMBL2402504	4.54045
review-com54_33	4.61979
narlaprevir	5.24463
CHEMBL50	4.62114
CHEMBL2311733	4.34974
review-com8-2s	5.5376
CHEMBL2442075	4.65048
CHEMBL538957	4.30573
CHEMBL2402681	5.80943
review-com11_5p	6.92082
CHEMBL2402499	5.22996
review3-com13-7	3.69897
CHEMBL213543	6.18353
CHEMBL2311730	5.00257
6lnq-12b	6.73366
review-com13_11t	5.84164
CHEMBL2402502	5.79476
review-com8-2i	8.38722
CHEMBL397154	5.00257
review-com11_5o	6.09691
review-com11_5h	8.20066
CHEMBL2442077	5.16394
review-com11_5l	5.17392
review3-com55-3	3.07345
review-com11_5n	7.65758
review-com13_11s	6.61979
review-com8-2k	7.85387
review-com8-2o	6.18709
review3-com5	4.88606
CHEMBL2316337	5.33998
CHEMBL2311726	4.32773
review-com13_11q	5.20273
CHEMBL2402684	5.49402
review3-com61_5b	4.69897
CHEMBL406516	5.00257
review-com9_10-26k	6.07572
CHEMBL553172	3.87296
PMC2597651_3	6.41825
review-com8-2p	8.52288
CHEMBL2442079	5.11259
CHEMBL3402619	4.24705
CalpainXII	6.3449
review-com11_5c	7.18709
CHEMBL2311731	5.2593
CHEMBL12798	3.68224
calpeptin	4.97323
CHEMBL1929015	4.21037
CHEMBL28	3.55021
review3-com61_5a	4.82391
CHEMBL2316336	4.40842
CHEMBL2442073	5.42067
CHEMBL2311727	5.2813
CHEMBL2402692	6.18353
MG-115	5.50136
review-com12_6c	6.30103
CHEMBL1929017	5.24463
CHEMBL3402617	4.16636
review-com11_5b	5.76955
CHEMBL380403	4.92188
CHEMBL2402683	6.0735
CHEMBL208908	4.4451
CHEMBL551569	3.93897
review-com46_45	3.75696
6y2g_13a	5.61872
review-com12_6b	6.1549
review-com13_11u	5.8962
CHEMBL557699	3.7996
review-com8-2t	5.82391
review3-com145_17	4.55129
review-com8-2r	5.46852
CHEMBL3402615	3.87296
CHEMBL2402678	6.15419
CHEMBL2402677	6.16152
review-com11_5j	7.52288
CHEMBL2402501	6.33756
CHEMBL3402616	3.87296
CHEMBL212080	7.23979
CHEMBL2442082	5.20795
CHEMBL551181	3.2348
review-com11_5k	7.58503
CHEMBL4299306	6.74833
CHEMBL2442076	5.38399
CHEMBL1929018	6.41092
review-com8-2u	5.12494
CHEMBL1405735	5.6554
CHEMBL1929021	5.00257
review-com13_11p	4.97143
CHEMBL2311709	5.22262
6lnq-12a	6.16152
CHEMBL2401746	6.21287
CHEMBL549695	6.2202
review3-com4	4.40894
review-com8-2n	7.95861
CHEMBL537916	3.5282
review-com11_5r	6.16749
CHEMBL1929022	6.4696
review3-com145_16r	5.82391
CHEMBL63354	4.85586
MG-132	5.406
review-com11_5d	7.17392
CHEMBL2402686	6.48427
CHEMBL1929020	6.57229
review-com54_2	6.22185
CHEMBL555061	4.67982
CHEMBL277716	5.64806

## Sheet: Table S7
SARS-CoV BA
PDBID/LIGANDID	pKd/pKi/pIC50
4wy3	3.62
4twy	3.97
2qiq	4.1
3sna	4.14
2alv	4.15
4tww	4.2
3vb4	4.31
3vb7	4.31
3snb	4.38
3snc	4.39
3vb6	4.41
3snd	5.08
4mds	5.21
3aw0	5.24
2vj1	5.3
3v3m	5.32
3vb5	5.34
2gz8	5.52
3sn8	5.65
2op9	5.66
2hob	5.72
2z94	5.85
2v6n	5.86
3d62	6.1
2z9g	6.15
2gz7	6.52
2zu5	7
3atw	7.01
3avz	7.19
2zu4	7.42
6y2g	6.174
6m2n	6.027
7brp	5.38
6wtk	6.4
6wtj	6.72
6m0k	7.42
6lze	7.28
6lo0	6.08
6lny	6.29
5n19	5.71
2gx4	7.28
2amd	5.71
1wof	4.91
6wtt	7.52
CHEMBL2402500	4.63581
CHEMBL4130313	5.17128
CHEMBL2402676	5.1346
CHEMBL2311700	4.40842
CHEMBL2311729	4.12235
review-com8-2m	6.12494
review-com9_10-25f	4.5376
CHEMBL235873	4.82652
CHEMBL1230135	5.04658
CHEMBL2402680	6.24954
CHEMBL378188	4.09301
CHEMBL555220	4.4671
PSI	4.98056
review-com54_30	4.61979
CHEMBL539208	3.44018
review-com13_11n	6.48149
CHEMBL477164	6.69698
review-com11_5e	6.79588
CHEMBL151	4.70183
CHEMBL2311705	4.29839
CHEMBL2402507	5.49402
PMC2597651_4	6.29355
review-com13_11o	5.07058
6y2g_11r	6.74833
CHEMBL2402508	6.37424
CHEMBL2442074	5.03924
review-com8-2l	5.72125
review-com11_5g	6.48149
CHEMBL2402682	5.07592
review-com11_5a	5.56864
review-com8-2j	7.65758
CHEMBL2402685	6.41092
review3-com13-3	4.09691
CHEMBL377324	4.51845
review-com11_5i	7.31876
CHEMBL2402503	5.76542
CHEMBL2402504	4.54045
review-com54_33	4.61979
narlaprevir	5.24463
CHEMBL50	4.62114
CHEMBL2311733	4.34974
review-com8-2s	5.5376
CHEMBL2442075	4.65048
CHEMBL538957	4.30573
CHEMBL2402681	5.80943
review-com11_5p	6.92082
CHEMBL2402499	5.22996
review3-com13-7	3.69897
CHEMBL213543	6.18353
CHEMBL2311730	5.00257
6lnq-12b	6.73366
review-com13_11t	5.84164
CHEMBL2402502	5.79476
review-com8-2i	8.38722
CHEMBL397154	5.00257
review-com11_5o	6.09691
review-com11_5h	8.20066
CHEMBL2442077	5.16394
review-com11_5l	5.17392
review3-com55-3	3.07345
review-com11_5n	7.65758
review-com13_11s	6.61979
review-com8-2k	7.85387
review-com8-2o	6.18709
review3-com5	4.88606
CHEMBL2316337	5.33998
CHEMBL2311726	4.32773
review-com13_11q	5.20273
CHEMBL2402684	5.49402
review3-com61_5b	4.69897
CHEMBL406516	5.00257
review-com9_10-26k	6.07572
CHEMBL553172	3.87296
PMC2597651_3	6.41825
review-com8-2p	8.52288
CHEMBL2442079	5.11259
CHEMBL3402619	4.24705
CalpainXII	6.3449
review-com11_5c	7.18709
CHEMBL2311731	5.2593
CHEMBL12798	3.68224
calpeptin	4.97323
CHEMBL1929015	4.21037
CHEMBL28	3.55021
review3-com61_5a	4.82391
CHEMBL2316336	4.40842
CHEMBL2442073	5.42067
CHEMBL2311727	5.2813
CHEMBL2402692	6.18353
MG-115	5.50136
review-com12_6c	6.30103
CHEMBL1929017	5.24463
CHEMBL3402617	4.16636
review-com11_5b	5.76955
CHEMBL380403	4.92188
CHEMBL2402683	6.0735
CHEMBL208908	4.4451
CHEMBL551569	3.93897
review-com46_45	3.75696
6y2g_13a	5.61872
review-com12_6b	6.1549
review-com13_11u	5.8962
CHEMBL557699	3.7996
review-com8-2t	5.82391
review3-com145_17	4.55129
review-com8-2r	5.46852
CHEMBL3402615	3.87296
CHEMBL2402678	6.15419
CHEMBL2402677	6.16152
review-com11_5j	7.52288
CHEMBL2402501	6.33756
CHEMBL3402616	3.87296
CHEMBL212080	7.23979
CHEMBL2442082	5.20795
CHEMBL551181	3.2348
review-com11_5k	7.58503
CHEMBL4299306	6.74833
CHEMBL2442076	5.38399
CHEMBL1929018	6.41092
review-com8-2u	5.12494
CHEMBL1405735	5.6554
CHEMBL1929021	5.00257
review-com13_11p	4.97143
CHEMBL2311709	5.22262
6lnq-12a	6.16152
CHEMBL2401746	6.21287
CHEMBL549695	6.2202
review3-com4	4.40894
review-com8-2n	7.95861
CHEMBL537916	3.5282
review-com11_5r	6.16749
CHEMBL1929022	6.4696
review3-com145_16r	5.82391
CHEMBL63354	4.85586
MG-132	5.406
review-com11_5d	7.17392
CHEMBL2402686	6.48427
CHEMBL1929020	6.57229
review-com54_2	6.22185
CHEMBL555061	4.67982
CHEMBL277716	5.64806

## Sheet: Table S8
PDBID	MathDL-ALL-1	MathDL-ALL-2	MathDL-ALL-3	MathDL-ALL-4	MathDL-ALL-5	MathDL-MT-1	MathDL-MT-2	MathDL-MT-3	MathDL-MT-4	MathDL-MT-5	MathDL-Core2016	Consensus	Binding Site Index	Hydrogen Bond	Covalent Bond	Synthetic Accessibility Score	LogP	LogS
7c8t	-9.14062	-8.92383	-8.87625	-8.1406	-9.12246	-9.01404	-9.2231	-9.23334	-8.13207	-9.02918	-9.06007	-8.89959	1	Gln189_NE2-N25:3.24,His164_O-N31:3.26,Gly143_N:3.11,Cys145_SC-N31:2.93,His163_NE2-O54:2.70,Glu166_OE2-N49:3.11	Cys145:1.697	4.17	2.46	-3.59
5rg1	-8.87457	-8.34335	-8.46595	-8.50513	-8.30992	-8.29193	-8.56171	-8.94781	-8.53233	-8.3027	-8.35362	-8.499	1	Glu166_N-O3:3.38,His163_NE-O2:3.05		2.92	1.36	-2.713
6xhm	-9.10844	-8.28741	-8.18266	-8.24057	-8.93624	-8.13327	-8.59564	-8.88362	-8.23706	-8.60574	-8.25782	-8.49714	1	Phe140_O-N31:3.23,His163_NE2-O33:2.72,Cys145_N-O35:2.95,His164_O-N23:2.89,Gln189_OE1-N14:3.01,Glu166_OE2-N31:3.23	Cys145:1.855	3.72	1.13	-3.124
7bqy	-8.97236	-8.38643	-8.42593	-8.51837	-8.48028	-7.85903	-8.71687	-8.81365	-7.97352	-8.47539	-8.78304	-8.49135	1	Thr190_O-N:2.78, Gln189_OE1-N:3.06, Glu166_O-N:2.95,Glu166_N-O:2.83, Glu166_OE2-N6:3.15,Phe140_O-N6:3.32, His164_O-N5:2.78,Gly143_N-O:3.26,Cys145_N-O7:3.22,His163_NE2-O8:2.62	Cys145:1.77	3.82	2.21	-3.596
5rfr	-8.54709	-8.52341	-8.17888	-8.34114	-8.5358	-8.46679	-8.30868	-8.54283	-8.82056	-8.46874	-8.24339	-8.45248	1	Gly143_N-O:2.78, Ser46_N-Br:3.10	Cys145:1.82	2.06	1.83	-3.366
6z2e	-8.55746	-8.24275	-8.29208	-7.57737	-8.45205	-8.58521	-8.83638	-8.80092	-8.42339	-8.61926	-8.29249	-8.4254	1	Cys145_N-O3:3.3,Glu166_O-N33:3.0,Glu166_N-O27:3.0,Gln189_OE1-N25:3.0	Cys145:1.8	5.62	1.34	-3.111
6y2f	-8.06718	-8.41429	-8.11331	-7.87038	-8.4086	-8.83327	-8.34284	-9.00454	-7.98053	-8.26523	-9.01542	-8.39232	1	Phe140_O-N49:3.20,His41_NE2-O40:2.68,Gly143_N-O41:2.76,Cys145_O41:3.03,His164_O-C36:2.83,Glu166_O-N23:2.96,His163_NE2-O48:2.57	Cys145:1.807	4.12	1.92	-3.838
6xbi	-8.41094	-7.94355	-8.24078	-8.07455	-8.34764	-8.25354	-8.2282	-8.63146	-7.80886	-8.20845	-9.63506	-8.34391	1	Glu166_O-N:2.83,Glu166_N-O:2.91,His163_NE2-O27:2.77,Cys145_N-O32:3.02,His164_O-N19:2.96,Gln189_OE1-N:2.87, Gly143_N-O32:2.75,His41_NE2-O29:2.69	Cys145:1.638	4.06	1.37	-3.064
6xmk	-8.61415	-8.43903	-8.55267	-8.31354	-8.22108	-8.32896	-8.95506	-8.94629	-7.82987	-8.23654	-7.19245	-8.32997	1	His164_O-N17:2.98,Cys145_SG-N17:2.99,Gly143_N-O27:3.33,His163_NE2-O25:2.69,Glu166_OE2-N22:3.03,Gln189_OE1-N10:2.94,Gln189_NE2-O08:3.08	Cys145:1.826	4.33	-0.63	-2.978
5rh7	-7.85277	-8.49094	-8.39254	-8.64421	-8.28313	-7.78861	-8.22062	-8.84776	-8.12344	-8.18991	-8.6356	-8.31541	1	Met49_SD-N3:2.86,His163_NE2-N2:2.65,Glu166_N-O1:2.87	Cys145:1.812	3.3	4.11	-5.652
6xbh	-8.48664	-8.64823	-7.86796	-8.16254	-8.38613	-7.95941	-8.23918	-8.30882	-8.44251	-8.12567	-8.29501	-8.26564	1	Glu166_N-O28:3.10,Gln189_OE1-N:2.84		3.32	1.46	-3.803
7c8r	-8.27853	-8.08763	-8.32522	-7.43186	-8.29232	-7.69799	-8.66176	-8.25636	-7.90194	-8.0691	-9.29977	-8.20932	1	His41_NE2-O03:3.07,His164_O-N16:3.11,Gln189_OE1-N24:2.87,Glu166_N-O26:2.86,His163_NE2-O15:2.59,Phe140_O-N13:3.30	Cys145:1.662	4.19	2.96	-4.111
6yt8	-7.86685	-8.36244	-7.98434	-8.10105	-8.2019	-8.13762	-8.61209	-8.44805	-8.27163	-8.13871	-7.70205	-8.16607	1			5.29	0.69	-1.684
5ret	-7.60718	-8.11983	-7.73858	-7.29653	-8.60431	-8.50764	-8.2315	-9.24307	-8.09566	-8.36143	-7.35013	-8.10508	1	Gly143_N-O:2.77	Cys145:181	1.65	1.73	-3.024
6xbg	-8.19309	-8.61286	-8.12542	-7.46797	-8.22633	-8.21687	-8.57201	-8.78404	-8.04254	-7.44088	-7.38102	-8.09664	1	Glu166_N-O28:3.05,Glu166_OE2-N25:3.21,His163_NE2-O27:2.80,His41_NE2-O29:2.59,Cys145_N-O32:2.96,His164_O-N19:2.94,Gln189_OE1-N:2.86, Gly143_N-O32:2.79	Cys145:1.724	3.72	0.67	-3.072
5rfu	-6.76861	-7.73789	-7.06036	-7.29752	-8.26591	-9.40077	-8.77452	-8.55432	-8.26351	-8.29813	-7.64283	-8.00585	1	Gly143_N-O:2.76,Cys145_N-O:3.01	Cys145:1.81	2.11	0.7	-2.614
5ren	-7.73004	-7.68019	-8.16786	-6.84981	-7.47154	-7.8213	-8.41897	-8.47396	-8.22807	-8.36933	-8.39005	-7.96374	1	Gly143_N-O:2.68	Cys145:1.80	2.48	2.83	-3.848
5rgu	-7.95291	-7.32714	-8.03931	-7.73947	-7.79637	-7.72965	-8.1068	-8.08086	-7.58142	-7.96293	-8.46196	-7.88898	1	His163_NE2-N1:2.82,Glu166_N-O:3.04,Glu166_O-N3:3.28		2.93	0.07	-3.014
5rh9	-7.68527	-7.71839	-7.7969	-7.77152	-7.47716	-7.40563	-8.11172	-8.14898	-7.99	-7.91098	-8.68782	-7.88222	1	His163_NE2-N2:2.69,Glu166_N-O1:2.83	Cys145:1.812	3.15	3.6	-6.609
6lu7	-8.34045	-7.65964	-7.78319	-7.55401	-7.42089	-7.51629	-8.43097	-7.9531	-7.65681	-7.74566	-8.50012	-7.86919	1	Thr190_O-N:2.85,Glu166_O-N:2.83,Glu166_N-O:2.98,His163_NE2-O8:2.52,Phe140_O-N6:3.13,Gly143_N-O:2.80,Cys145_N5:3.15,His164_O-N5:3.07,Gln189_OE1-N:2.93	Cys145:1.765	4.29	2.21	-3.596
6wnp	-7.87528	-8.33935	-7.62522	-7.62547	-7.59776	-7.19682	-7.50845	-7.85274	-7.73465	-7.60977	-9.24749	-7.83755	1	Glu166_O-N29:3.23,Glu166_O-N27:2.91,Glu166_N-O:3.12,His41_NE2-O04:2.60,Gly143_N-O01:2.78,Cys145_N-O01:2.90	Cys145:1.805	4.34	1.75	-3.356
5rer	-7.51096	-7.54295	-7.33584	-7.28185	-7.53497	-8.43454	-8.13955	-8.05393	-8.58236	-8.13109	-7.40944	-7.81432	1	Gly143_N-O1:2.71, Cys145_N-O1:3.08	Cys145:1.81	2.43	1.45	-2.316
5rft	-7.88871	-8.03604	-7.63932	-7.14491	-8.05243	-8.08504	-7.98733	-7.94336	-7.67682	-7.48795	-7.7268	-7.78807	1	Gly143_N-O1:2.98,Cys145_N-O1:3.37	Cys145:1.81	2.39	3.13	-3.91
5rfk	-7.73732	-7.4614	-6.46541	-8.01263	-7.9906	-8.25207	-7.67646	-7.13132	-8.64538	-8.32104	-7.83397	-7.77524	1	Gly143_N-O:2.68	Cys145:1.82	1.62	0.84	-2.243
5res	-7.63472	-7.32937	-7.9445	-6.98917	-7.7609	-8.60478	-7.50298	-7.93434	-8.15836	-8.08577	-7.22532	-7.74275	1	Gly143_N-O2:2.85,Cys145_N-O2:3.01	Cys145:1.81	1.83	0.2	-2.325
7c7p	-8.08504	-7.85786	-7.42373	-7.83974	-7.85726	-6.81688	-7.53779	-8.05779	-7.64958	-7.54052	-8.36564	-7.73017	1	Gln189_NE2-OBU:3.09,Glu166_O-NAC:2.88,His164_O-NAE:3.07,Gly143_N-OBS:2.89,Cys145_N-OBS:3.04,Leu141_NE2-OBR:2.44	Cys145:1.817	4.65	2.37	-3.648
5rfp	-7.15621	-7.70026	-6.96866	-6.9445	-8.18282	-7.68501	-8.14842	-8.03658	-8.46231	-8.24228	-7.19453	-7.70196	1	His41_NE2-N3:3.19	Cys145:1.83	2.07	2.34	-2.826
5r81	-7.75254	-7.39854	-7.82989	-8.19527	-7.92797	-7.02325	-8.08043	-8.46265	-7.39491	-7.31	-6.75582	-7.6483	1	N/A		2.14	1.29	-2.155
5rep	-7.56884	-7.20963	-8.0841	-6.79311	-7.51199	-8.05686	-7.51197	-7.67947	-8.17017	-7.93079	-7.56513	-7.64382	1	Gly143_N-O2:2.86,Cys145_N-O2:2.96	Cys145:1.82	2.03	0.86	-2.39
5rh6	-7.16455	-7.65512	-8.14542	-7.36255	-7.59215	-7.18026	-7.70186	-7.97506	-7.29141	-7.93968	-7.8603	-7.62439	1	His163_NE2-N2:2.76,Glu166_N-O1:2.91	Cys145:1.802	3.06	3.82	-6.552
5rey	-7.39297	-8.06772	-7.8968	-6.54555	-7.7765	-7.48608	-7.74764	-7.88784	-7.93071	-7.03195	-8.00656	-7.61548	1	Gly143_N-O:2.81,Cys145_N-O:2.96	Cys145:1.82	1.71	1.55	-2.726
6w63	-6.97737	-7.9841	-7.1173	-7.17436	-8.07847	-7.47176	-7.73903	-8.44013	-7.442	-7.35614	-7.88577	-7.60604	1	Gly143_N-O1:2.94, Glu166_N-O13:2.80, His163_NE2_N18:2.88		3.18	4.01	-5.451
5rek	-7.57763	-7.30285	-7.04524	-6.68494	-7.77878	-8.48154	-7.44986	-7.62248	-8.06929	-7.91438	-7.71774	-7.60407	1	Gly143_N-O2:2.77,Cys145_N-O2:3.08	Cys145:1.81	1.82	0.24	-2.349
5rgt	-7.48776	-7.38612	-7.52585	-7.54063	-7.77333	-7.00044	-8.09133	-7.58218	-7.19715	-7.82201	-8.01681	-7.58397	1	His163_NE2-N2:2.70,Glu166_N-O1:2.71	Cys145:1.751	3.32	3.21	-4.981
5rh5	-6.6125	-7.62946	-8.01313	-7.89632	-7.80644	-6.9034	-7.71927	-7.94586	-7.49184	-7.41682	-7.78643	-7.56559	1	His163_NE2-N2:2.75,Glu166_N-O1:2.86	Cys145:1.775	3.19	3.65	-5.749
5rfh	-7.48498	-6.54656	-7.23722	-7.5204	-6.7003	-8.39113	-7.31475	-8.30142	-8.01728	-8.23634	-7.15434	-7.53679	1	Gly143_N-O: 2.72	Cys145:1.81	2.01	1.92	-2.975
5rfm	-7.27661	-7.09788	-7.787	-7.25061	-7.38683	-7.37665	-7.36712	-7.24544	-8.13794	-8.27691	-7.41776	-7.51098	1	Gly143_N-O8:2.98,Thr26_N-O8:2.86	Cys145:1.81	3.02	0.83	-2.956
5rfi	-7.42768	-7.38538	-6.70567	-7.02982	-8.34259	-7.37123	-8.10096	-7.9332	-7.43489	-7.54079	-7.25051	-7.50206	1	Gly143_N-O2:2.71,Cys145_N-O2:3.10	Cys145:1.81	1.88	0.24	-2.424
5rex	-7.44811	-8.02264	-7.2122	-6.66384	-7.70051	-7.90624	-7.57221	-7.78277	-8.02191	-7.22461	-6.72475	-7.47998	1	Gly143_N-O:3.24	Cys145:1.79	1.69	2.28	-3.512
5rfl	-6.89184	-7.204	-6.60288	-7.76581	-8.02304	-8.23685	-7.80902	-7.38688	-7.91121	-7.48543	-6.81192	-7.46626	1	Gly143_N-O2:2.72,Ser144_N-O2:2.87,Cys145_N-O2:2.76	Cys145:1.82	1.79	1.08	-2.599
6xfn	-7.02831	-7.82902	-7.46047	-7.32451	-6.85809	-7.30037	-7.97746	-8.01465	-7.38954	-7.98336	-6.66143	-7.43884	1	His163_NE2-C2:3.11,Cys145_N-O27:3.16,His164_O-N:3.14,Gly143_N-O27:2.94,His41_NE2-O24:2.41,Ser144_N-O27:3.14	Cys145:1.712	2.43	-1.93	0.78
5rg3	-6.41472	-7.41477	-7.05473	-6.95251	-7.25074	-8.38844	-7.51839	-7.22446	-8.34769	-6.94377	-7.68467	-7.38135	1	Thr24_O-N2:3.07,Thr26_O-N3:2.72,Thr26_O-N1:2.72	Cys145:1.79	2.65	-1.42	-1.263
5rgn	-7.70512	-7.20898	-7.71838	-6.65434	-6.88341	-7.79268	-7.34282	-7.68523	-7.61765	-7.70458	-6.75992	-7.37028	1	Gly143_N-O2:2.68,Cys145_N-O2:3.05	Cys145:1.82	1.71	0.17	-2.316
5rh2	-7.69691	-7.49168	-7.03746	-6.58803	-7.09392	-7.21348	-7.42697	-8.26018	-7.17447	-8.21924	-6.60305	-7.34595	1	His163_NE2-N:2.67,Glu166_N-O:3.12		1.79	2.66	-3.872
5rew	-7.98305	-7.29906	-6.81561	-6.73578	-6.5962	-7.88995	-7.91548	-7.24282	-7.73593	-7.40693	-7.04481	-7.33324	1	Gly143_N-O:2.86,Cys145_N-O:3.26	Cys145:1.82	2.07	2.73	-3.489
5rel	-7.14974	-7.17561	-7.57528	-6.34902	-7.46152	-7.53098	-7.55338	-7.97904	-7.55187	-7.13104	-7.16111	-7.32896	1	Gly143_N-O:2.73,Cys145_N-O:3.09	Cys145:1.81	1.63	0.87	-2.236
5rfw	-7.27688	-6.79864	-7.45141	-6.98964	-6.91978	-7.58997	-7.2397	-7.41961	-7.97789	-7.53394	-7.38475	-7.32566	1	Gly143_N-O:2.78	Cys145:1.81	1.88	0.55	-2.043
5rff	-6.83968	-7.00024	-7.03656	-6.62133	-7.33673	-8.49881	-6.36963	-7.17759	-8.34891	-7.92	-7.43053	-7.32545	1	Gly143_N-O:2.92,Cys145_N-O:3.09	Cys145:1.81	1.73	0.8	-2.671
5rfs	-7.00607	-6.43189	-7.29927	-6.77213	-7.5229	-7.48097	-7.46724	-7.88062	-7.73339	-7.59889	-7.29773	-7.31737	1	Gly143_N-O:2.73	Cys145:1.81	1.97	0.51	-2.069
5rfn	-6.18356	-6.08894	-7.23807	-6.54549	-6.5926	-8.68691	-8.19411	-7.83631	-7.30276	-8.49311	-7.24298	-7.30953	1	Gly143_N-O1:2.98,Cys145_N-O1:3.35,Thr26_N-O18:3.02	Cys145:183	3.04	0.88	-2.847
6xa4	-6.90753	-7.18903	-7.39392	-7.59821	-7.39676	-7.13738	-6.87238	-7.66477	-7.33876	-7.41	-7.3259	-7.29406	1	Glu166_N-O:3.06,Glu166_O-N:3.03	Cys145:1.696	3.32	1.14	-2.762
5rgw	-7.39465	-6.83377	-7.08745	-6.75803	-7.43468	-7.11363	-7.50815	-7.93087	-7.217	-7.29926	-7.65354	-7.29373	1	HIs41_ND1-N1:3.10,His163_NE2-N3:2.72,Glu166_N-O:2.95		2.15	0.71	-2.843
6yvf	-7.77076	-7.17509	-7.41029	-6.83671	-7.02872	-7.42615	-7.46567	-8.41273	-7.53791	-7.13563	-5.90898	-7.2826	4			3.08	1.43	-4.073
5rfo	-7.18298	-7.37615	-6.55685	-7.42703	-6.24043	-7.44889	-7.31576	-7.276	-8.13242	-7.60143	-7.4466	-7.27314	1	Gly143_N-O:2.68	Cys145:1.82	1.82	1.12	-1.793
6xch	-7.31176	-7.30804	-6.71532	-7.22802	-7.12932	-7.01743	-7.348	-7.87241	-7.02168	-7.52067	-7.309	-7.25288	1	Glu166_O-N:2.84,Glu166_O-N:2.81		4.22	-0.28	-0.48
5rg2	-7.11509	-6.86278	-6.74927	-7.22867	-7.19388	-8.8266	-7.07832	-7.63851	-7.45799	-6.98818	-6.47619	-7.23777	1	Thr26_N-O1:2.94,Thr26_O-N2:3.03	Cys145:1.64	2.95	-0.78	-0.886
5rgl	-7.33505	-6.7743	-6.37744	-6.81451	-7.6964	-7.42689	-7.49064	-7.37318	-7.87047	-7.24841	-6.83444	-7.20379	1	Gly143_N-O1:3.30,Cys145_N-O1:3.28	Cys145:.181	1.57	0.66	-1.988
5rfx	-7.51303	-6.68742	-6.97088	-7.01958	-7.16183	-7.49071	-7.85267	-6.97925	-7.23426	-7.25363	-7.0373	-7.20005	1	Gly143_N-O1:2.73,Cys145_N-O1:2.87	Cys145:1.82	1.57	1.44	-1.903
5rf1	-6.85258	-6.59389	-6.51068	-7.5488	-7.70362	-7.46326	-8.20084	-7.12675	-7.85222	-6.66425	-6.68191	-7.19989	1	Glu166_O-N:2.83		1.6	1.33	-2.332
5rfv	-6.93604	-6.45894	-7.0189	-6.98642	-7.51839	-7.5334	-6.92331	-7.57704	-7.27562	-7.75495	-7.1496	-7.19387	1	Gly143_N-O:2.71	Cys145:1.80	1.86	0.25	-2.295
5rh3	-7.81286	-7.80698	-6.71753	-6.04657	-7.4155	-6.70617	-6.40538	-7.94962	-7.1859	-8.37251	-6.55191	-7.17918	1	His163_NE2-N1:2.69,Glu166_N-O:3.22		2.41	3.19	-4.391
5rfg	-6.80883	-7.01813	-7.00751	-6.67017	-6.87212	-7.48158	-7.70712	-6.94338	-7.80087	-7.80703	-6.84512	-7.17835	1	Gly143_N-O1:2.77	Cys145:1.81	2.99	0.52	-2.631
5reo	-7.66846	-7.14259	-6.41594	-6.86241	-6.01337	-8.56084	-7.4022	-7.12214	-7.1132	-7.72995	-6.84028	-7.17013	1	His41_NE2-N:3.13, Gly143_N-O:2.71	Cys145:1.81	1.8	1.25	-1.972
5rgp	-7.3452	-7.16067	-7.13693	-6.15514	-7.18123	-7.89112	-6.62353	-6.60846	-8.13638	-7.63589	-6.62262	-7.13611	1	Gly143_N-O2:2.86,Cys145_N-O2:3.11	Cys145:1.81	1.89	0.25	-2.441
5reu	-6.94407	-6.68496	-6.2847	-6.92432	-7.68101	-7.28669	-7.27926	-7.87378	-7.44827	-7.23892	-6.7062	-7.12293	1	Gly143_N-O:2.64	Cys145:1.81	2.01	-0.21	-2.244
5rfe	-7.24133	-6.83127	-6.3247	-6.35483	-7.52142	-7.83932	-7.06398	-7.6458	-7.68394	-7.32395	-6.34161	-7.10656	1	His41_ND1-N18:3.08,His164_O-N18:3.35		1.91	0.23	-1.912
5rej	-6.98896	-6.56198	-6.56182	-6.46671	-7.09818	-7.2253	-8.17606	-8.06333	-7.04082	-7.02161	-6.88204	-7.0988	1	Gly143_N-O:2.75,Cys145_N-O:2.88	Cys145:1.82	2.01	-0.14	-2.282
5rf7	-6.41697	-6.93801	-7.10864	-6.58883	-7.63964	-7.57946	-7.36655	-6.87671	-7.3046	-7.23029	-6.94729	-7.09064	1	His163_NE2-N3:2.92,Phe140_O-N4:3.18,Glu166_N-O1:3.01		2.16	0.31	-1.849
5rgi	-6.59072	-7.37134	-7.07024	-5.47455	-7.13309	-8.42729	-6.58434	-7.56146	-6.74519	-7.76448	-7.14286	-7.07869	1	Gly143_N-O11:2.81,Cys145_N-O11:3.29,His163_NE2-N9:2.79		2.32	1.01	-2.138
5rgz	-7.09954	-6.50298	-6.83751	-6.62074	-7.82519	-7.19745	-6.84507	-7.8193	-6.83319	-7.41757	-6.71358	-7.06474	1	HIs41_ND1-N:3.24,His163_NE2-N2:2.71,Glu166_N-O:2.92		1.84	1.71	-3.107
5rgm	-7.30746	-6.42845	-6.3906	-6.75671	-6.78832	-7.38935	-7.4804	-7.44745	-7.17098	-7.74622	-6.80503	-7.06463	1	Gly143_N-O:2.88,Ser144_N-O:2.92,Cys145_N-O:2.80,His41_N1-NE2:3.18	Cys145:1.82	2.25	1.84	-2.677
5rem	-7.37548	-6.49085	-6.82897	-6.6556	-6.59304	-7.41772	-7.47584	-7.18248	-7.42124	-7.42578	-6.67304	-7.04909	1	Gly143_N-O2:2.52,Ser144_N-O2:2.75,Cys145_N-O2:2.86	Cys145:1.81	1.82	1.56	-2.454
5rfz	-6.65714	-6.85908	-5.73162	-6.35832	-8.09073	-7.31474	-6.64534	-7.69222	-7.92967	-7.66582	-6.41559	-7.03275	1	Gly143_N-O:3.19,Cys145_N-O:3.17	Cys145:1.81	1.79	1.27	-1.987
5r80	-6.64143	-6.88785	-8.06814	-6.91582	-7.13986	-7.05532	-7.258	-7.84315	-6.72616	-6.61398	-6.1177	-7.02431	1	Glu166_O-N14:2.99		1.54	0.48	-1.696
5r84	-6.16395	-6.60838	-6.92188	-6.1697	-7.28275	-7.52889	-7.2759	-7.46695	-7.11358	-7.35182	-6.83824	-6.97473	1	His163_NE2-N1:2.71,Glu166_N-O:3.05		1.81	2.64	-3.083
6yz6	-6.89881	-6.69203	-6.87777	-7.22806	-6.7589	-7.18378	-7.28036	-7.22555	-6.77405	-6.98906	-6.7577	-6.96964	1	Glu166_O-N:2.76,Glu166_N-O:2.85		3.94	0.47	-2.249
5rev	-6.39155	-6.84443	-6.33797	-6.67387	-7.05302	-7.12477	-6.79337	-7.70469	-7.03951	-7.75687	-6.92056	-6.96733	1	Gly143_N-O:2.62,Thr26_N-O1:3.14	Cys145:1.80	1.93	1.35	-2.974
5rgx	-6.95518	-6.67264	-6.58498	-6.18387	-7.79071	-6.92941	-6.98704	-7.14011	-6.66725	-7.55183	-6.4652	-6.90257	1	HIs41_ND1-N2:3.24,His163_NE2-N:2.72,Glu166_N-O:3.01		1.97	1.89	-3.275
5rfq	-6.6903	-6.40756	-6.05876	-6.39813	-6.89285	-6.91927	-6.95575	-7.15989	-8.32968	-6.9833	-7.02749	-6.893	1	Gly143_N-O:2.98,Cys145_N-O:3.17	Cys145:1.81	1.77	0.92	-2.562
5r83	-6.94608	-6.93853	-7.03231	-6.91894	-6.99139	-7.30618	-6.72634	-6.64766	-6.96468	-6.55741	-6.54677	-6.87057	1	His163_NE2-N2:2.96,Glu166_N-O:3.00		1.49	2.07	-3.295
5rez	-6.51788	-7.20838	-6.15367	-6.28423	-6.91479	-7.40019	-6.45301	-7.90441	-7.13073	-7.59404	-5.7181	-6.84359	1	Glu166_N-O3:2.99,Glu166_O-N1:2.62		3.21	1.85	-2.444
5rhf	-6.75819	-6.74957	-6.64883	-7.08256	-6.65368	-7.18152	-6.72099	-7.17369	-6.89555	-7.16958	-6.06592	-6.82728	1	Gly143_N-O1:2.85,Cys145_N-O1:2.98	Cys145:1.813	1.9	1.14	-2.578
6xb1	-6.3817	-7.24286	-6.46052	-6.76484	-7.37092	-6.65262	-6.70168	-6.80052	-7.12701	-6.19376	-7.08958	-6.79873	11			2.14	-0.09	-0.366
5rh8	-6.21708	-6.20167	-7.01933	-6.52974	-7.2046	-6.77562	-7.0557	-6.29679	-7.01428	-7.55459	-6.90852	-6.79799	1	Glu166_O-N2:3.05		2.54	1.77	-3.497
7buy	-6.3528	-6.90685	-7.01187	-6.81022	-6.62451	-6.03597	-6.15978	-6.43415	-7.21504	-7.64725	-7.14293	-6.75831	1	Gly143_N-O15:3.00,Cys145_N-O15:2.95	Cys145:1.770	1.73	1.71	-1.877
6xb2	-6.6237	-7.33357	-6.43945	-6.66408	-6.59817	-7.23341	-6.30978	-7.2095	-6.78195	-6.1268	-6.95642	-6.75244	1		Cys145:1.794	2.14	-0.09	-0.366
5rfy	-6.95717	-6.28864	-6.08943	-6.81222	-5.62904	-7.12324	-7.19309	-6.9042	-7.24643	-7.00451	-6.97778	-6.7478	1	Gly143_N-O1:2.65,Cys145_N-O1:3.14	Cys145:1.81	2.1	0.65	-1.148
5rh1	-6.43716	-7.68685	-5.69543	-6.2831	-6.11469	-7.48157	-6.48769	-7.01085	-8.05706	-5.37521	-5.98291	-6.60114	1	His163_NE2-N1:2.72,Glu166_N-O:3.29		2	2.53	-3.792
5rhe	-6.5164	-6.05109	-6.65283	-6.02118	-6.47625	-7.15543	-7.5273	-6.12153	-6.78843	-6.91498	-6.24085	-6.58784	1	Gly143_N-O1:3.00,Cys145_N-O1:3.26	Cys145:1.718	1.95	0.61	-2.28
5rha	-6.3552	-6.06152	-6.09275	-6.05125	-6.74683	-7.32175	-6.35905	-6.3557	-6.93899	-7.77013	-6.02609	-6.55266	1	Gly143_N-O:2.82	Cys145:1.808	1.88	0.55	-2.043
5rgo	-6.24499	-6.00587	-6.35354	-6.00526	-6.79225	-6.88214	-6.928	-7.16521	-6.62488	-6.55297	-6.30055	-6.53233	1	Gly143_N-O:2.91	Cys145:1.81	1.87	0.04	-1.575
5rhd	-5.5255	-5.88145	-6.32216	-6.90314	-7.64406	-6.75623	-5.42725	-6.84393	-7.32464	-6.79392	-6.03655	-6.49626	1	Thr25_OG1-N1:2.87,Cys44_O-N1;2.69,Glu166_N-O:2.76		1.89	0.25	-2.153
5rgv	-6.15854	-6.68839	-6.91773	-5.25707	-6.66578	-7.17258	-6.70465	-7.45071	-5.75307	-6.56803	-5.49119	-6.43888	1	His163_NE2-N:2.88,Glu166_N-O:2.90		1.72	2.83	-4.514
5rfj	-6.16735	-6.33675	-5.52968	-6.36072	-6.51813	-7.15088	-5.92396	-7.5016	-6.72147	-6.50707	-5.88201	-6.41815	1	Gly143_N-O1:2.79,Gly143_N-S:3.33,Cys145_N-O1:3.11	Cys145:1.82	1.9	2.12	-3.331
5rgy	-5.68634	-6.59977	-6.50671	-5.91749	-6.95425	-6.83535	-6.64572	-6.96186	-5.7765	-6.48558	-6.17456	-6.4131	1	Glu166_N-N:2.85,Glu166_O-N1:2.84		1.84	3.19	-4.593
5rgq	-5.52501	-7.19486	-6.64546	-6.84448	-6.04154	-6.86789	-6.1753	-6.62276	-6.62054	-6.04153	-5.57033	-6.37724	12			2.08	0.95	-1.675
5r7y	-5.80522	-6.10719	-6.54191	-6.00971	-5.79726	-6.14658	-6.63787	-5.83633	-7.99548	-6.83143	-6.17263	-6.35287	1	N/A		1.56	1.35	-1.8
5rh0	-6.84276	-5.86412	-5.7421	-6.26698	-6.13418	-6.95912	-7.17654	-6.84075	-6.08877	-6.00104	-5.92068	-6.34882	1	His163_NE2-N2:3.13		2.19	2.32	-3.538
5rfa	-5.82009	-6.74497	-5.58112	-6.49544	-6.46138	-6.90356	-7.16002	-5.63037	-5.73161	-6.38797	-6.8373	-6.34126	12			2.65	0.15	-1.349
5rea	-5.68504	-7.23015	-7.49461	-6.21052	-5.86589	-6.26753	-6.33716	-4.476	-6.44499	-6.66121	-6.29283	-6.26963	3			1.78	2.34	-3.087
5rgk	-7.01662	-6.46955	-7.12001	-5.43436	-5.59543	-6.92421	-6.22792	-5.90846	-6.15668	-5.47611	-6.58484	-6.26493	1	His163_NE2-N16:2.99		1.65	1.92	-3.074
5rf0	-6.82553	-7.72952	-6.26838	-5.51871	-5.70307	-5.48665	-5.50435	-7.10528	-7.59623	-4.92144	-5.85731	-6.22877	2			2.44	1.6	-1.798
5reb	-5.77917	-6.64665	-6.54741	-5.62172	-5.8146	-6.14407	-6.51428	-7.21015	-6.417	-6.0438	-5.68087	-6.21997	1	N/A		2.11	1.5	-1.925
5reh	-6.22447	-7.08826	-7.13267	-5.22868	-6.07623	-6.79309	-5.57422	-6.57053	-5.43491	-5.57062	-6.55375	-6.20431	1	His163_NE2-N1:3.02,Asn142_ND2-O1:3.04		1.88	1.99	-2.779
5rec	-5.55043	-6.50718	-5.69744	-5.83027	-7.03634	-6.36969	-6.50405	-6.66413	-6.67012	-5.43633	-5.66416	-6.17547	9			1.97	2.83	-3.687
5re4	-5.64224	-5.83587	-6.57917	-5.08992	-6.79826	-6.05407	-7.12654	-6.76965	-6.03597	-5.52936	-6.19897	-6.15091	1	Glu166_N-O3:2.93,His163_NE2-N7:2.87		1.84	0.56	-1.409
5rgh	-5.46348	-5.62317	-5.82305	-5.78673	-6.06532	-6.84131	-6.71614	-6.22018	-5.56402	-7.64744	-5.52684	-6.11615	1	N/A		3.1	1.39	-2.297
5reg	-6.84413	-6.67838	-5.87598	-5.73493	-5.0165	-6.66873	-5.80325	-6.47691	-6.92419	-5.39081	-5.81199	-6.11144	7			2.25	0.49	-2.212
5rei	-6.52334	-6.722	-4.37584	-5.82075	-6.66838	-5.7216	-6.66453	-6.69371	-6.38618	-5.45339	-6.05161	-6.0983	6			1.6	2.1	-2.577
5r82	-6.70231	-5.45908	-6.0365	-6.50787	-6.39743	-5.54444	-5.56932	-5.90853	-6.49911	-6.59478	-5.71141	-6.08462	1	His164_O-N9:3.38,His41_ND1-N9:3.06,Gln189_OE1-N11:3.18,Gln189_OE1-N3:2.66		2.16	1.14	-1.475
5re7	-4.90896	-5.23393	-6.85643	-7.19848	-6.39124	-5.9568	-4.96554	-6.95371	-7.47418	-5.30437	-5.48404	-6.06615	10			1.67	-0.2	-1.986
5rf6	-6.21237	-4.94251	-5.55916	-5.91014	-5.7951	-5.59981	-6.13854	-5.34858	-7.46167	-6.25319	-5.69317	-5.90129	1	N/A		2.33	1.26	-1.688
5re5	-5.78395	-5.27783	-6.32064	-5.82874	-6.11449	-5.63774	-5.83852	-5.60986	-6.64188	-5.31859	-6.53812	-5.90094	4			1.67	0.77	-2.319
5rg0	-5.956	-5.22274	-4.93101	-5.58285	-5.42841	-6.82347	-6.18291	-5.11526	-7.16003	-6.31623	-5.48486	-5.83671	1	Gly143_N-O1:2.93,Cys145_N-O1:3.03	Cys145:1.80	1.74	-0.95	-0.756
5re9	-5.24071	-5.86123	-6.49944	-6.29142	-5.25644	-6.40906	-4.75356	-5.81777	-5.49067	-6.16988	-6.13206	-5.81111	1	N/A		3.11	-2.05	-1.479
5rh4	-6.13524	-5.91888	-4.87588	-5.69889	-5.77588	-5.57557	-6.37861	-5.83941	-5.58522	-6.08659	-5.74587	-5.78327	4			2.54	4.09	-4.816
5rfc	-5.47729	-5.97568	-6.11955	-5.29764	-5.71927	-7.33636	-6.35152	-5.24578	-6.2852	-4.50157	-5.14676	-5.76878	4			2.05	3.34	-3.923
5ref	-5.11903	-5.50296	-5.29335	-6.14395	-5.91282	-6.36099	-5.9916	-5.92748	-5.44847	-5.67539	-5.04333	-5.67449	8			1.66	0.98	-2.001
6ynq	-5.26602	-5.96315	-4.63108	-5.66488	-5.18888	-5.83925	-6.36404	-4.97269	-5.74722	-5.86908	-4.97104	-5.49794	1	HIs163_NE2-O12:2.61	Cys145:1.935	2.4	2.33	-2.356
5rf9	-5.64048	-7.2421	-4.95485	-6.15447	-5.57586	-6.25767	-5.38392	-3.96274	-4.04389	-4.56241	-6.14383	-5.44747	11			2.78	0.08	-1.206
5rgs	-4.77881	-5.4161	-4.98757	-5.03303	-5.81401	-6.44307	-4.79159	-6.58006	-5.80331	-5.06642	-5.13382	-5.44071	9			2.25	1.04	-1.48
5rhb	-5.49399	-5.62803	-5.64151	-5.32959	-5.32107	-5.99312	-5.15961	-5.24707	-5.41037	-5.59086	-4.98648	-5.43652	1	Gly143_N-N1:3.19,Cys145_SG-N2:3.06	Cys145:1.819	3.3	-0.12	0.07
5rhc	-5.34166	-5.32883	-5.48877	-5.23997	-5.25549	-5.92378	-5.43509	-4.92436	-5.08058	-5.76574	-5.00727	-5.34469	1	Gly143_N-N1:3.12	Cys145:1.864	3.84	-0.5	0.222
5r7z	-5.59191	-5.44833	-5.674	-4.76585	-5.32458	-5.41884	-5.48388	-4.97876	-4.55012	-6.29883	-4.80297	-5.30346	1	Glu166_O-N1:2.78,His41_ND1-F:3.11		1.96	1.74	-2.721
5ree	-5.00167	-5.85398	-4.57996	-4.99486	-5.02629	-5.32321	-5.1565	-4.90456	-6.47803	-5.327	-5.06208	-5.2462	9			2.63	1.84	-2.289
5rgg	-4.73418	-5.8241	-4.95087	-4.88531	-5.88785	-6.03583	-5.50435	-5.1784	-4.90084	-4.62821	-5.02728	-5.23247	4			1.55	1.14	-1.532
5rfd	-4.2982	-4.66643	-5.15543	-5.97982	-4.56121	-6.2562	-6.42397	-5.7291	-4.22071	-5.07273	-4.88973	-5.20487	13			2.13	0.75	-2.257
5rf4	-5.24442	-5.83786	-4.20469	-5.14253	-5.12144	-5.73206	-5.23507	-5.12462	-4.92121	-4.26065	-4.23584	-5.00549	13			2.52	0.64	0.163
5rf8	-6.05943	-4.7953	-5.11762	-5.37462	-4.63138	-5.00668	-4.02773	-5.99387	-4.24963	-3.70443	-5.29303	-4.93216	5			1.83	0.84	-2.988
5rf5	-4.98474	-5.70512	-5.60313	-4.55617	-5.26219	-4.67527	-4.39246	-4.62782	-4.6449	-4.468	-5.2189	-4.9217	6			3.07	-1.68	-0.113
5red	-4.69987	-5.49502	-4.5366	-4.48837	-4.63535	-4.22431	-4.56519	-4.73223	-4.76908	-4.65974	-6.2013	-4.81882	6			1.82	1.73	-2.427
5re8	-4.75273	-5.43294	-4.06791	-5.08355	-4.53115	-5.14189	-4.89802	-4.57696	-6.19488	-3.91229	-4.1013	-4.79033	13			1.77	2.11	-3.112
5rfb	-4.93267	-4.7043	-4.07601	-4.14876	-4.58059	-4.06199	-5.45858	-4.17857	-4.83976	-5.30987	-4.69745	-4.63532	4			2.51	-0.27	-0.743
5rf2	-4.42798	-5.55272	-4.92837	-5.01699	-4.542	-3.88444	-4.88736	-4.16926	-4.26217	-4.37308	-4.56692	-4.60103	1	His41_O-N4:2.71,Cys44_O-N4:3.22,Cys44_O-N5:3.37		4.31	-1.11	0.361
5re6	-4.64033	-4.63957	-3.88151	-4.18283	-3.36505	-3.70705	-4.45502	-4.41172	-5.36502	-4.68989	-5.87278	-4.47371	4			1.84	1.19	-3.189
5rf3	-4.61363	-3.82747	-4.56127	-4.20737	-4.57693	-4.38841	-4.16137	-3.90471	-4.18279	-4.85556	-4.32776	-4.32793	1	Glu166_OE1-N:3.15,His163_NE2-N2:2.92		2.59	-0.44	0.443
5rgj	-4.12584	-4.90525	-3.52003	-4.49733	-4.69099	-3.40163	-3.33176	-3.7312	-3.28822	-3.78526	-4.09194	-3.94268	11			3.66	0.83	-1.45

## Sheet: Table S9
Fragments	PDBIDs	Frequency
[5*]N[5*]	['7bqy', '5rg1', '6w63', '5rfp', '5rfk', '5rg3', '5r84', '5rew', '5rfl', '5rg2', '5rgi', '5reo', '5r83', '5rfq', '5rfa', '5rfz', '5rfe', '5rev', '5re4', '5re7', '5reh', '5rfj', '5rgk', '5r82', '5re5', '5ref', '5r7z', '5r7y', '5rec', '5rfc', '5rgg', '5reg', '5rf8', '5re6', '5rfb', '5re8', '5rgt', '5rgu', '5rgv', '5rgw', '5rgx', '5rgy', '5rgz', '5rh0', '5rh1', '5rh2', '5rh3', '5rh5', '5rh6', '5rh7'…	70
[1*]C(C)=O	['5ren', '5rfr', '5rg1', '5ret', '5rfn', '5rfh', '5rer', '5rfp', '5rfk', '5rey', '5rfw', '5rfu', '5rft', '5rfo', '5rex', '5rek', '5rg3', '5rfs', '5rfm', '5rfi', '5rel', '5rfv', '5rew', '5rfl', '5rg2', '5rfg', '5reo', '5res', '5rep', '5rgl', '5reu', '5rem', '5rfx', '5rfq', '5rfz', '5rgo', '5rev', '5re4', '5rff', '5rgp', '5rgn', '5re7', '5rej', '5rfy', '5rfj', '5rg0', '5r7z', '5re6', '5rha', '5rhe'…	53
[4*]C[8*]	['7bqy', '5rfr', '5ret', '5rfh', '5rey', '5rfw', '5rex', '5rfs', '5rel', '5rgi', '5reo', '5rfa', '5rfe', '5rei', '5re7', '5rgh', '5rec', '5reb', '5rgs', '5ree', '5rfb', '5re8', '5rh8', '5rha', '6lu7', '6wtt', '6xbg', '6xbh', '6xmk', '6y2f', '7c8r', '7c8t', '7c8u']	33
[5*]N1CCN([5*])CC1	['5rfr', '5ret', '5rfh', '5rfw', '5rfu', '5rex', '5rek', '5rfs', '5rfi', '5rel', '5rfv', '5res', '5rep', '5rgl', '5reu', '5rem', '5rfx', '5rgo', '5rff', '5rgp', '5rgn', '5rej', '5rg0', '5rha']	24
[1*]C([6*])=O	['7bqy', '6w63', '5rfk', '5rfo', '5rfv', '5rfl', '5rgl', '5rfa', '5rgo', '5rev', '5r80', '5rfy', '5rgk', '5rea', '5ref', '5reg', '5rh8', '5rhe', '5rhf', '6lu7', '6wnp', '6xhm', '7c7p']	23
[16*]c1ccccc1	['7bqy', '5rfk', '5rfg', '5r83', '5re5', '5r7y', '5red', '5rfc', '5rgs', '5ree', '5rgg', '5rgv', '5rhf', '6lu7', '6wtt', '6xbg', '6xbh', '6xbi', '6y2f', '7c8r', '7c8t', '7c8u']	22
[1*]C([1*])=O	['5rgi', '5r83', '5rfe', '5reh', '5re5', '5rfc', '5rgg', '5rh0', '6wnp', '6wtt', '6xbg', '6xbh', '6xbi', '6xmk', '6y2f', '7c8r', '7c8t', '7c8u']	18
[3*]O[3*]	['7bqy', '5re9', '5re6', '5rgu', '5rh8', '6lu7', '6wtt', '6xbg', '6xbh', '6xbi', '6xmk', '6y2f', '6z2e', '7c8r', '7c8t', '7c8u']	16
[16*]c1cccnc1	['6w63', '5r84', '5r83', '5rgt', '5rgw', '5rgz', '5rh0', '5rh1', '5rh5', '5rh6', '5rh7', '5rh9']	12
[15*][C@@H]1CCNC1=O	['7bqy', '6lu7', '6wtt', '6xbg', '6xbh', '6xbi', '6xhm', '6xmk', '6y2f', '7c8r', '7c8t', '7c8u']	12
[1*]C(=O)[C@@H]([4*])CC(C)C	['7bqy', '6lu7', '6wtt', '6xa4', '6xbg', '6xbi', '6xhm', '6xmk', '6yz6', '6z2e', '7c8r', '7c8u']	12
[1*]C(=O)C[8*]	['5rf7', '5r84', '5rf9', '5rgu', '5rgv', '5rgw', '5rgx', '5rgy', '5rgz', '5rh1', '5rh2']	11
[3*]OC	['5rfx', '5r80', '5rfj', '5ref', '5rfc', '5rgy', '5rh5', '5rh9', '5rhe', '6xhm']	10
[5*]N([5*])[5*]	['5rfn', '6w63', '5rfm', '5rfg', '5rgt', '5rh5', '5rh6', '5rh7', '5rh9']	9
[5*]N1CCC([15*])CC1	['5rfk', '5rfo', '5rfl', '5rfy', '5re5', '5rhe', '5rhf']	7
[1*]C(=O)[C@H]([4*])[8*]	['6w63', '5rgt', '5rh5', '5rh6', '5rh7', '5rh9']	6
[16*]c1ccc([16*])cc1	['6w63', '5rfx', '5reg', '5re6', '5rh9']	5
[15*]C1CCCCC1	['6w63', '5r84', '5reh', '7c7p', '7c8t']	5
[16*]c1cccc(Cl)c1	['5ret', '5rfp', '5rei', '5rh2', '5rh3']	5
[15*]C1CC1	['5rgi', '6xbg', '6xbi', '6y2f', '7c7p']	5
[1*]C(=O)CC	['5rgt', '5rh5', '5rh6', '5rh7', '5rh9']	5
[4*]C(C)(C)C	['5rgt', '6wnp', '6y2f', '7c8r', '7c8t']	5
[4*]CC[8*]	['5reh', '5rgk', '5r7z', '5r7y']	4
[16*]c1cccc([16*])c1	['5rfq', '5rev', '5ref', '5rgu']	4
[8*]C(C)(C)C	['6w63', '5rgt', '5rh5', '5rh7']	4
[16*]c1cnccc1C	['5re4', '5rgx', '5rh2', '5rh3']	4
[16*]c1ccc(C)cc1	['5rfm', '5rgl', '5re9']	3
[16*]c1ccsc1	['5rfs', '5rez', '5reb']	3
[5*]N1CCOCC1	['5rfe', '5rei', '5red']	3
[6*]C(N)=O	['5rez', '5re5', '5reg']	3
[14*]c1cccs1	['5rfw', '5rfv', '5rha']	3
[14*]c1cc(C)on1	['7bqy', '5rgi', '6lu7']	3
[4*]CC	['5r82', '5rfb', '7c8r']	3
[5*]N([5*])C	['5rgi', '5rfy', '5rhf']	3
[1*]C(=O)[C@@H]([4*])C[8*]	['5rg1', '6xbh', '7c8t']	3
[8*]CC	['5rh6', '5rh7', '6xb2']	3
[1*]C(=O)[C@@H]([4*])C(C)(C)C	['6wnp', '6z2e', '7c7p']	3
[4*][C@@H](C[8*])[C@@H](O)S(=O)(=O)O	['6wtt', '6xmk', '7c8u']	3
[1*]C(=O)[C@H](O)[C@@H]([4*])C[8*]	['6xbg', '6xbi', '6y2f']	3
[14*]c1nc2ccccc2[nH]1	['5rec', '5rfd']	2
[15*][C@@H]1C=CS(=O)(=O)C1	['5rfn', '5rfm']	2
[5*]N1CCN(C)CC1	['5rf7', '5rgg']	2
[16*]c1ccc(F)cc1	['5rfn', '5rer']	2
[16*]c1ccc(S(N)(=O)=O)cc1	['5r80', '5re7']	2
[14*]c1ccccn1	['5rf0', '5rf8']	2
[16*]c1ccc2c(c1)OCO2	['5reo', '5rea']	2
[14*]c1ccco1	['5rgo', '5re8']	2
[16*]c1ccncc1	['5reh', '5rgk']	2
[12*]S(C)(=O)=O	['5ref', '5r7y']	2
[13*][C@@H]1CCCO1	['5rfa', '5reg']	2
[16*]c1cccc2ccccc12	['5rex', '5rew']	2
[4*]CC=C	['5rg3', '5rg2']	2
[16*]c1ccccc1O	['5rfl', '5rec']	2
[8*]CO	['5rf0', '5rgs']	2
[1*]C(=O)[C@@H]([4*])C	['7bqy', '6lu7']	2
[14*]c1ccc(Cl)s1	['5rfh', '5rh1']	2
[1*]C(=O)C[7*]	['7bqy', '6lu7']	2
[4*][C@H](C[7*])C[8*]	['7bqy', '6lu7']	2
[14*]c1cnccn1	['5rgj', '7c7p']	2
[4*][C@H]([8*])C	['5rfp', '5rh9']	2
[1*]C(=O)[C@@H]([4*])C(C)C	['7bqy', '6lu7']	2
[4*]CC[4*]	['5red', '6z2e']	2
[14*]c1cc([14*])on1	['5rgt', '5rh5']	2
[16*]c1cccc(C#N)c1	['5rgx', '5rgz']	2
[16*]c1ccc([16*])c(C)c1	['5rh5', '5rh9']	2
[16*]c1cccc(C)c1[16*]	['5rh6', '5rh7']	2
[14*]c1ccc([16*])cn1	['5rh6', '5rhe']	2
[5*]NC(N)=[NH2+]	['6xch', '6yz6']	2
[1*]C(=O)[C@@H]([4*])[C@H]([4*])C	['7c8r', '7c8t']	2
[12*]S(=O)(=O)c1ccc(C)cc1	['5rgn']	1
[5*]N1CCCOCC1	['5rf6']	1
[14*]c1nc2c([16*])cccc2s1	['5rfj']	1
[5*]N1CCSCC1	['5rev']	1
[14*]c1cc2c(s1)CCCC2	['5rgm']	1
[6*]C(=O)NNC(C)=O	['5rgm']	1
[16*]c1c[nH]c2ncccc12	['5rf7']	1
[4*]C(C)C	['5rfy']	1
[5*]N1CCC[C@@H]([15*])C1	['5ren']	1
[14*]c1nc2ccccc2s1	['5ren']	1
[14*]c1ccc(Br)s1	['5rfr']	1
[16*]c1ccc(O)cc1	['5rg1']	1
[4*]CC#CBr	['5rg1']	1
[10*]N1CCCC1=O	['5rfq']	1
[12*]S(=O)(=O)c1cccs1	['5rej']	1
[14*]c1ccn(C)n1	['5rfa']	1
[15*][C@H]1C=CS(=O)(=O)C1	['5rfg']	1
[12*]S(=O)(=O)c1ccccc1F	['5res']	1
[12*]S(=O)(=O)c1c(F)cccc1F	['5rep']	1
CN1CCCc2ccc(S(N)(=O)=O)cc21	['5r81']	1
[12*]S(=O)(=O)c1ccccc1C#N	['5reu']	1
[16*]c1ccccc1[N+](=O)[O-]	['5rem']	1
[1*]C(=O)[C@H]([4*])[C@@H](C)O	['5rg2']	1
[16*]c1cccnc1Cl	['5rfz']	1
[4*][C@@H]([8*])C	['5rew']	1
[16*]c1ccc(C#N)cc1	['5rfe']	1
[12*]S(=O)(=O)c1ccc(Cl)cc1	['5rff']	1
NS(=O)(=O)c1ccc(Br)cc1	['5rf1']	1
[12*]S(=O)(=O)c1ccc(C)cc1C	['5rgp']	1
[16*]c1ccc(C#N)nc1	['5rf6']	1
[14*]c1c[nH]cn1	['6w63']	1
[12*]S(=O)(=O)c1cc(C)ccc1C	['5rfi']	1
[5*]N1CCO[C@H]([13*])C1	['5rer']	1
[8*]CS(C)(=O)=O	['5rfd']	1
CCC(N)=[NH2+]	['5rf2']	1
[12*]S(=O)(=O)c1ccc(N)cc1	['5rf8']	1
[14*]c1ncccn1	['5re6']	1
[14*]c1cn(C)nn1	['5rfb']	1
[16*]c1c[nH]c2ccc(F)cc12	['5r7z']	1
Oc1ccccn1	['5rf4']	1
O=S1(=O)CC(O)C1	['5rf5']	1
Nc1cncnc1	['5rf3']	1
[11*]S[11*]	['5red']	1
[16*]c1ccc(F)cc1C	['5rgq']	1
[9*]n1cccn1	['5rf9']	1
[5*]N1CCO[C@@H](C)C1	['5rf9']	1
[5*]N1CC[NH+](C)CC1	['5re9']	1
[8*]CS(N)(=O)=O	['5rgq']	1
[14*]c1ccc(C#N)cn1	['5r82']	1
[1*]C(=O)C[4*]	['5re9']	1
[16*]c1cccc(F)c1	['5re8']	1
[5*]N1CCO[C@@H]([13*])C1	['5rgs']	1
[5*]N1CCCCCC1	['5rea']	1
[16*]c1ccccc1C	['5rey']	1
[5*]N1CCCN([5*])CC1	['5rey']	1
[12*]S(=O)(=O)c1ccc(Cl)s1	['5rfu']	1
[5*]N1Cc2ccccc2[C@H](c2ccccc2)C1	['5rft']	1
[5*]N1CCCCC1	['5rfo']	1
[12*]S(=O)(=O)c1cccc(F)c1	['5rek']	1
[1*]C(=O)[C@@H]([4*])CC(N)=O	['5rg3']	1
[5*]N1CCC(O)CC1	['5reb']	1
[5*]N1CCC[C@H](O)[C@H]1C	['5ree']	1
[14*]c1nnc(C)s1	['5rgh']	1
[5*]N1CCC=C(F)C1	['5rgh']	1
[15*][C@H]1CCC[C@H]1[15*]	['5rez']	1
[16*]c1ccccc1F	['5rgk']	1
[15*]C1([15*])CCCC1	['5rf0']	1
[14*]c1nc(C)sc1[14*]	['5rfc']	1
[16*]c1cccc(C)c1	['5rel']	1
[5*]N1CC[C@]2(CCOC2)C1	['5rgj']	1
[16*]c1cncnc1	['5rgu']	1
[13*][C@@H]1CC(=O)N1	['5rgu']	1
[16*]c1cncc2ccccc12	['5rgv']	1
[16*]c1cncc(C#N)c1	['5rgw']	1
[14*]c1cc([16*])ccn1	['5rgy']	1
[16*]c1ccc2ccccc2c1	['5rgy']	1
[14*]c1ccc(C)s1	['5rh0']	1
[1*]C(=O)[C@@H]([8*])C	['5rh3']	1
[8*]C(C)C	['5rh6']	1
[14*]c1cc([14*])[nH]n1	['5rh7']	1
[16*]c1ccccc1[16*]	['5rh8']	1
[4*]CC#N	['5rh8']	1
[16*]c1cnsc1	['5rh8']	1
N=Cc1ncccn1	['5rhb']	1
N=Cc1ncc[nH]1	['5rhc']	1
[16*]c1ccc(S(C)(=O)=O)cc1	['5rhd']	1
[5*]N1CCNCC1	['5rhd']	1
[4*][C@@H](C[8*])[C@@H](O)C(N)=O	['6wnp']	1
[15*]C1CCC1	['6wnp']	1
[5*]N1C[C@H]2[C@@H]([C@H]1[13*])C2(C)C	['6wnp']	1
[4*]CC[C@H]([4*])CO	['6xa4']	1
[11*]SC	['6xa4']	1
[10*]N1C(=O)CCC1=O	['6xb2']	1
[4*][C@H](C=O)C[8*]	['6xbh']	1
[4*]CCC[C@H](N)C(O)O	['6xch']	1
OCC(O)CO	['6xfn']	1
[14*]c1cc2c([16*])cccc2[nH]1	['6xhm']	1
[4*][C@@H](C[8*])C(=O)CO	['6xhm']	1
[15*]C1CCC(F)(F)CC1	['6xmk']	1
[9*]n1cccc([16*])c1=O	['6y2f']	1
[1*]C(=O)[C@@H]([8*])C[8*]	['6y2f']	1
C[C@H]1CCc2ccccc2C1=O	['6ynq']	1
c1cc[n+]2c(c1)S[Zn]O2	['6yt8']	1
[4*]CCC[C@H]([4*])C(O)O	['6yz6']	1
[13*][C@H]1[SH]=C[C@@H]2NC(=O)N[C@@H]21	['6z2e']	1
[4*][C@@H](CCC(N)=O)CCS(C)(=O)=O	['6z2e']	1
[1*]C(=O)CCCC[8*]	['6z2e']	1
[1*]C(=O)CC[4*]	['6z2e']	1
[1*]C(=O)[C@@H]([4*])CC	['6z2e']	1
[4*]CCCCCC	['7buy']	1
[1*]C(=O)O	['7buy']	1
[1*]C(=O)[C@@H]([4*])[8*]	['7c7p']	1
[5*]N1C[C@@H]2CCC[C@@H]2[C@H]1[13*]	['7c7p']	1
[1*]C(=O)[C@H](O)[C@@H]([4*])CCC	['7c7p']	1
[1*]C(=O)CC[C@@H]([4*])C[8*]	['7c8r']	1
[4*][C@@H](C[8*])CO	['7c8t']	1
